# Supplementary material
Source: Royal Society of Chemistry journal article supplement (doi:10.1039/d6mr00053c)
Supplement: d6mr00053c1.pdf [file d6mr00053c1.pdf]

# Supplementary Information

## One-Sequence Mechanochemical Synthesis– Deracemisation of a Levetiracetam Intermediate.

Guillaume Wery,<sup>[a]</sup> and Tom Leyssens <sup>\*[a]</sup>

\*Corresponding author: [tom.leyssens@uclouvain.be](mailto:tom.leyssens@uclouvain.be)

---

[a] G. Wery, Prof. Dr. T. Leyssens,; Department of Molecular Chemistry, Materials and Catalysis; Institute of Condensed Matter and Nanosciences; Université Catholique de Louvain; Place Louis Pasteur, 1 bte L4.01.06, 1348 Louvain-La-Neuve (Belgium)

**Table of Contents**

|        |                                              |    |
|--------|----------------------------------------------|----|
| 1.     | Tables of experiments .....                  | 3  |
| 1.1.   | Mechanochemical synthesis of <b>1a</b> ..... | 3  |
| 1.2.   | One-pot deracemisation .....                 | 4  |
| 1.2.1. | Compound <b>1a</b> .....                     | 4  |
| 1.2.2. | Compound <b>1b</b> .....                     | 5  |
| 2.     | Experimental Section.....                    | 6  |
| 2.1.   | General Information .....                    | 6  |
| 2.1.1. | Materials .....                              | 6  |
| 2.1.2. | Devices .....                                | 6  |
| 2.2.   | Experimental Protocols.....                  | 7  |
| 3.     | Characterization .....                       | 9  |
| 3.1.   | <sup>1</sup> H-NMR-Spectra.....              | 9  |
| 3.2.   | cHPLC Analysis.....                          | 18 |

## 1. Tables of experiments

### 1.1. Mechanochemical synthesis of 1a

**Table S1** : List of the mechanochemical syntheses performed on **1a**. The mixture was milled 90 min at 30 Hz.

| N° | Base | $m_{1(RS)-2}$ [mg] | Bulk                            | $V_{\text{Bulk}}$ [mL] | Additives | Balls Ø [mm] | # of balls |
|----|------|--------------------|---------------------------------|------------------------|-----------|--------------|------------|
| S1 | NMM  | 280                | NaCl                            | 5.0                    | /         | 10           | 3          |
| S2 | NMM  | 280                | Na <sub>2</sub> SO <sub>4</sub> | 5.0                    | /         | 10           | 3          |
| S3 | DBU  | 280                | NaCl                            | 5.0                    | /         | 10           | 3          |
| S4 | DBU  | 280                | Na <sub>2</sub> SO <sub>4</sub> | 5.0                    | /         | 10           | 3          |
| S5 | NaOH | 280                | NaCl                            | 5.0                    | /         | 10           | 3          |
| S6 | NaOH | 280                | Na <sub>2</sub> SO <sub>4</sub> | 5.0                    | /         | 10           | 3          |

## 1.2. One-pot deracemisation

### 1.2.1. Compound 1a

**Table S2:** List of one-pot syntheses of enantioenriched **1a**. The mixture was milled 24 h at 30 Hz. <sup>[a]</sup> 0.3 equiv. of DBU + 1.0 equiv. of NaOH.

| N°    | Base                      | Jar              | $m_{((RS)-2)}$ [mg] | Bulk                            | $V_{\text{Bulk}}$ [mL] | Additives                       | Balls Ø [mm] | # of balls | Final ee | Yield |
|-------|---------------------------|------------------|---------------------|---------------------------------|------------------------|---------------------------------|--------------|------------|----------|-------|
| A1    | NMM                       | PTFE             | 280                 | NaCl                            | 5.0                    | /                               | 10           | 3          | 0%       | /     |
| A2    | NMM                       | PTFE             | 204                 | NaCl                            | 5.0                    | /                               | 10           | 3          | 2%       | /     |
| A3    | NMM                       | PTFE             | 280                 | Na <sub>2</sub> SO <sub>4</sub> | 5.0                    | /                               | 10           | 3          | 0%       | /     |
| A4    | NMM                       | PTFE             | 204                 | Na <sub>2</sub> SO <sub>4</sub> | 5.0                    | /                               | 10           | 3          | 5%       | /     |
| A5    | DBU                       | PTFE             | 280                 | NaCl                            | 5.0                    | /                               | 10           | 3          | 38%      | /     |
| A6    | DBU                       | PTFE             | 204                 | NaCl                            | 5.0                    | /                               | 10           | 3          | 27%      | /     |
| A7    | DBU                       | PTFE             | 280                 | Na <sub>2</sub> SO <sub>4</sub> | 5.0                    | /                               | 10           | 3          | 37%      | /     |
| A8    | DBU                       | PTFE             | 204                 | Na <sub>2</sub> SO <sub>4</sub> | 5.0                    | /                               | 10           | 3          | 67%      | /     |
| A9    | DBU + NaOH <sup>[a]</sup> | PTFE             | 204                 | NaCl                            | 5.0                    | /                               | 10           | 3          | 17%      | /     |
| A10   | DBU + NaOH <sup>[a]</sup> | PTFE             | 204                 | Na <sub>2</sub> SO <sub>4</sub> | 5.0                    | /                               | 10           | 3          | 4%       | /     |
| A11   | DBU                       | PTFE             | 280                 | Sand                            | 5.0                    | /                               | 10           | 3          | 54%      | 47%   |
| A12   | DBU                       | PTFE             | 204                 | Sand                            | 5.0                    | /                               | 10           | 3          | 7%       | 55%   |
| A13   | DBU                       | PTFE             | 280                 | NaCl                            | 5.0                    | Na <sub>2</sub> SO <sub>4</sub> | 10           | 3          | 73%      | /     |
| A14   | DBU                       | PTFE             | 204                 | NaCl                            | 5.0                    | Na <sub>2</sub> SO <sub>4</sub> | 10           | 3          | 36%      | /     |
| A15   | DBU                       | PTFE             | 280                 | Sand                            | 5.0                    | Na <sub>2</sub> SO <sub>4</sub> | 10           | 3          | 47%      | 89%   |
| A16-1 | DBU                       | PTFE             | 204                 | Sand                            | 5.0                    | Na <sub>2</sub> SO <sub>4</sub> | 10           | 3          | 87%      | 80%   |
| A16-2 | DBU                       | PTFE             | 204                 | Sand                            | 5.0                    | Na <sub>2</sub> SO <sub>4</sub> | 10           | 3          | 66%      | 64%   |
| A16-3 | DBU                       | PTFE             | 204                 | Sand                            | 5.0                    | Na <sub>2</sub> SO <sub>4</sub> | 10           | 3          | 81%      | 72%   |
| A16-4 | DBU                       | PTFE             | 204                 | Sand                            | 5.0                    | Na <sub>2</sub> SO <sub>4</sub> | 10           | 3          | 73%      | 77%   |
| A17   | DBU                       | PTFE             | 175                 | Sand                            | 5.0                    | Na <sub>2</sub> SO <sub>4</sub> | 10           | 3          | 55%      | 50%   |
| A18   | DBU                       | PTFE             | 150                 | Sand                            | 5.0                    | Na <sub>2</sub> SO <sub>4</sub> | 10           | 3          | 59%      | 34%   |
| A19-1 | DBU                       | PTFE             | 204                 | Sand                            | 6.0                    | Na <sub>2</sub> SO <sub>4</sub> | 10           | 3          | 94%      | 46%   |
| A19-2 | DBU                       | PTFE             | 204                 | Sand                            | 6.0                    | Na <sub>2</sub> SO <sub>4</sub> | 10           | 3          | 70%      | 49%   |
| A19-3 | DBU                       | PTFE             | 204                 | Sand                            | 6.0                    | Na <sub>2</sub> SO <sub>4</sub> | 10           | 3          | 62%      | 68%   |
| A20   | DBU                       | PTFE             | 204                 | Sand                            | 5.0                    | Na <sub>2</sub> SO <sub>4</sub> | 3            | 111        | 60%      | 54%   |
| A21   | DBU                       | PTFE             | 204                 | Sand                            | 5.0                    | Na <sub>2</sub> SO <sub>4</sub> | 5            | 24         | 72%      | 96%   |
| A22   | DBU                       | PTFE             | 204                 | Sand                            | 5.0                    | Na <sub>2</sub> SO <sub>4</sub> | 12           | 1          | 63%      | 57%   |
| A23   | DBU                       | PTFE             | 204                 | Sand                            | 5.0                    | Na <sub>2</sub> SO <sub>4</sub> | 12           | 2          | 20%      | 49%   |
| A24   | DBU                       | PTFE             | 204                 | Sand                            | 6.0                    | Na <sub>2</sub> SO <sub>4</sub> | 5            | 24         | 30%      | 70%   |
| A25   | DBU                       | PTFE             | 204                 | Sand                            | 6.0                    | Na <sub>2</sub> SO <sub>4</sub> | 10           | 4          | 36%      | 52%   |
| A26   | DBU                       | PTFE             | 204                 | Sand                            | 6.0                    | Na <sub>2</sub> SO <sub>4</sub> | 12           | 1          | 11%      | 81%   |
| A27-1 | DBU                       | ZrO <sub>2</sub> | 146                 | Sand                            | 3.6                    | Na <sub>2</sub> SO <sub>4</sub> | 10           | 1          | 86%      | 57%   |
| A27-2 | DBU                       | ZrO <sub>2</sub> | 146                 | Sand                            | 3.6                    | Na <sub>2</sub> SO <sub>4</sub> | 10           | 1          | 96%      | 44%   |
| A27-3 | DBU                       | ZrO <sub>2</sub> | 146                 | Sand                            | 3.6                    | Na <sub>2</sub> SO <sub>4</sub> | 10           | 1          | 68%      | 77%   |

## 1.2.2. Compound 1b

**Table S3:** List of one-pot syntheses of enantioenriched **1b**. The mixture was milled 24 h at 30 Hz.

| N°          | Base | Jar              | $m_{(RS)-2}$ [mg] | Bulk | $V_{\text{Bulk}}$ [mL] | Additives                       | Balls Ø [mm] | # of balls | Final ee | Yield |
|-------------|------|------------------|-------------------|------|------------------------|---------------------------------|--------------|------------|----------|-------|
| <b>B1</b>   | DBU  | PTFE             | 204               | Sand | 5.0                    | Na <sub>2</sub> SO <sub>4</sub> | 10           | 3          | 80%      | 55%   |
| <b>B2-1</b> | DBU  | PTFE             | 190               | Sand | 5.0                    | Na <sub>2</sub> SO <sub>4</sub> | 10           | 3          | 92%      | 86%   |
| <b>B2-2</b> | DBU  | PTFE             | 190               | Sand | 5.0                    | Na <sub>2</sub> SO <sub>4</sub> | 10           | 3          | 89%      | 62%   |
| <b>B2-3</b> | DBU  | PTFE             | 190               | Sand | 5.0                    | Na <sub>2</sub> SO <sub>4</sub> | 10           | 3          | 62%      | /     |
| <b>B2-4</b> | DBU  | PTFE             | 190               | Sand | 5.0                    | Na <sub>2</sub> SO <sub>4</sub> | 10           | 3          | 17%      | 72%   |
| <b>B3-1</b> | DBU  | ZrO <sub>2</sub> | 136               | Sand | 3.6                    | Na <sub>2</sub> SO <sub>4</sub> | 10           | 1          | 40%      | 66%   |
| <b>B3-2</b> | DBU  | ZrO <sub>2</sub> | 136               | Sand | 3.6                    | Na <sub>2</sub> SO <sub>4</sub> | 10           | 1          | 73%      | 53%   |
| <b>B3-3</b> | DBU  | ZrO <sub>2</sub> | 136               | Sand | 3.6                    | Na <sub>2</sub> SO <sub>4</sub> | 10           | 1          | 59%      | 77%   |

## 2. Experimental Section

### 2.1. General Information

#### 2.1.1. Materials

All chemicals were obtained from commercial sources and used without further purification. Benzaldehyde (>98%) and N-Methylmorpholine (>99%) were purchased from TCI Chemicals (Tokyo, Japan). (*RS*)-2-Aminobutyramide hydrochloride (95%)<sup>1</sup> and o-Tolualdehyde (99.47%) were obtained from BLDPharm (Shanghai, China), while additional (*RS*)-2-Aminobutyramide hydrochloride<sup>2</sup> was supplied by Fluorochem Ltd (Glossop, United Kingdom). Sodium chloride (>99.8%) and sodium sulphate (>99%)<sup>3</sup> were purchased from Carl Roth (Karlsruhe, Germany), whereas sodium sulphate (99%)<sup>4</sup> was also obtained from Thermo Scientific (Waltham, United States of America). Sodium hydroxide (98.4%) was purchased from Fisher (Pittsburgh, United States of America). DBU (98%) was obtained from Sigma-Aldrich (Burlington, United States of America). Methanol and Fontainebleau sand (technical grade) were supplied by VWR (Radnor, United States of America).

All chemicals were obtained from commercial sources and used without further purification.

#### 2.1.2. Devices

**<sup>1</sup>H-Nuclear Magnetic Resonance (<sup>1</sup>H-NMR)** spectra were recorded on a JEOL (Tokyo, Japan) JNM-ECZL400 R series spectrometer operating at 400 MHz. All spectra were acquired in DMSO-d<sub>6</sub>, with residual solvent signals used as internal standards. Chemical shifts ( $\delta$ ) and signal multiplicities are reported as follows: s = singlet, t = triplet, dd = doublet of doublets and m = multiplet.

**Chiral High-Performance Liquid Chromatography (cHPLC)** analyses were carried out on a Waters (Milford, United States of America) ARC HPLC system equipped with a Waters PDA 2998 detector set at 230 nm. Separations were performed on Daicel (Osaka, Japan) Chiralpak IA (5  $\mu$ m, 4.6  $\times$  250 mm) whose has a stationary phase consisting of an amylose derivative, 3,5-dimethylphenylcarbamate, immobilised on silica. The mobile phase consisted of mixtures of isohexane (A) and 2-propanol (B), with solvent ratios optimized for each analyte. The chromatographic conditions applied to each compound are detailed below:

- Compound **1a**: elution with 90% A / 10% B for 15 min; flow rate 1.0 mL.min<sup>-1</sup>; injection volume 5  $\mu$ L.
- Compound **1b**: elution with 95% A / 5% B for 15 min; flow rate 1.0 mL.min<sup>-1</sup>; injection volume 5  $\mu$ L.

The samples were prepared by dissolving 10 mg of sample in 4 ml of a mixture 90% A / 10% B. Subsequently, 1 ml of this sample was filtered into the appropriate cHPLC vial.

**Ball-milling** experiments were performed using a MM400 mixer mill provided by Retsch (Haan, Germany) either in ZrO<sub>2</sub> jars (Retsch, 10 mL ; 18 mm ID x 50.5 mm IL) or in PTFE jars (InSolido Technologies (Zagreb, Croatia), 14 mL, 19 mm ID x 57.2 mm IL). The ZrO<sub>2</sub> vessels were cleaned between each use, first by grinding them half-filled with sand and technical ethanol for 3 minutes at 30 Hz, then by washing them with water and subsequently with acetone. The PTFE vessels were cleaned between each use by washing them with water and subsequently with acetone.

---

<sup>1</sup> For the synthesis part

<sup>2</sup> For the one-pot deracemisation

<sup>3</sup> For compound **1b**

<sup>4</sup> For compound **1a**

## 2.2. Experimental Protocols

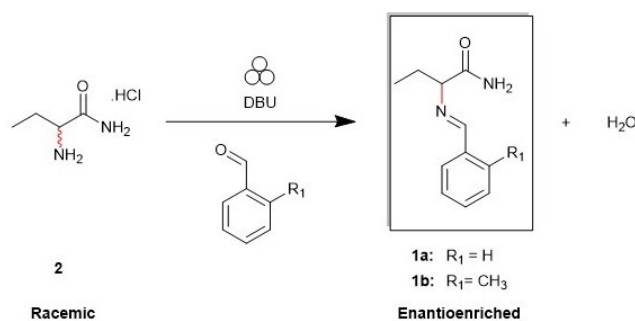

**Scheme S1:** One-pot synthesis of enantioenriched imines. The absolute configuration of **1a/1b** cannot be predicted but is determined by chPLC. Complete details of experimental conditions and the final ee are reported in **Tables S1-5**

A 14 mL PTFE or a 10 mL ZrO<sub>2</sub> milling jar was sequentially charged with (RS)-**2** (1.0 equiv.), bulk material, the corresponding additive (2.0 equiv., when applicable), ZrO<sub>2</sub> milling balls, the base (1.1 equiv. for the synthesis study or 1.3 equiv. for MCDR experiments), and the aldehyde (1.0 equiv.). The mixture was milled at 30 Hz for 1.5 h (synthesis study) or 24 h (MCDR). Upon completion of milling, the resulting solid was suspended in approximately 25 mL of water and filtered to remove inorganic salts, excess base, and any unreacted starting materials. The crude product was subsequently dissolved in MeOH to maximize recovery of the imine and to separate it from the sand. After filtration, the solvent was removed under reduced pressure. The product was obtained as a white powder and is characterized by <sup>1</sup>H-NMR spectroscopy and chPLC to determine the final ee. chPLC conditions are described in section 2.1.2.

For the synthesis study, <sup>1</sup>H-NMR analysis was also performed directly after milling, prior to suspension in water, in order to confirm that the reaction occurred during the milling process and that no side reactions took place during the subsequent work-up.

The mass/volume of reactants/bulk change in function of the conditions (initial m<sub>(RS)-2</sub>, nature/equiv. of base, bulk, ...). **Tables S4-5** indicate the calculated mass/volume.

### <sup>1</sup>H-NMR results

- Compound **1a** (exp A16-1): <sup>1</sup>H-NMR (400 MHz, DMSO-*d*<sub>6</sub>) δ 8.32 (s, 1H), 7.84 (dd, 2H), 7.54 – 7.41 (m, 3H), 7.16 (s, 1H), 7.11 (s, 1H), 3.64 (dd, 1H), 1.93 – 1.77 (m, 1H), 1.74 – 1.58 (m, 1H), 0.81 (t, 3H). (**Figure S13**)
- Compound **1b** (exp B2-2): <sup>1</sup>H-NMR (400 MHz, DMSO-*d*<sub>6</sub>) δ 8.58 (s, 1H), 7.92 (dd, 1H), 7.40 – 7.31 (m, 1H), 7.30 – 7.21 (m, 2H), 7.16 (s, 1H), 7.05 (s, 1H), 3.67 (dd, 1H), 2.50 (s, 3H), 1.93 – 1.76 (m, 1H), 1.74 – 1.59 (m, 1H), 0.82 (t, 3H). (**Figure S16**)

### chPLC results

*N.B. One different chiral column "Daicel Chiralpak IA (5 μm, 4.6 × 250 mm)" were used, leading to two different pairs of retention time (RT) for each molecule.*

- Compound **1a**:
  - o Exp S1, S3, A1-4, A12, A16-26: chPLC (RT, min.) 7.8; 10.7 (**Figures S22, S24, S28-S31, S39, S43-S58**)
  - o Exp S2, S4-6, A5-11, A13-15, A27: chPLC (RT, min.) 7.4; 10.1 (**Figures S23, S25-S27, S32-S38, S40-S42, S59-S61**)
- Compound **1b**:
  - o Exp B1, B2: chPLC (RT, min.) 11.5; 12.5 (**Figures S62-S66**)
  - o Exp B3: chPLC (RT, min.) 11.2; 12.2 (**Figures S67-S69**)

**Table S4:** Mass of the bulk material, depending on their volume

| Bulk                            | m <sub>Bulk</sub> |
|---------------------------------|-------------------|
| NaCl                            | 5.0 mL → 6.3 g    |
| Na <sub>2</sub> SO <sub>4</sub> | 5.0 mL → 7.0 g    |
| Sand                            | 3.6 mL → 5.4 g    |
|                                 | 5.0 mL → 7.6 g    |
|                                 | 6.0 mL → 9.3 g    |

**Table S5:** Calculate volume/mass of reactants, depending on the conditions.

| m <sub>(RS)-2</sub> | Additive                                                  | Base                                                                                                                                              | Aldehyde                                                                |
|---------------------|-----------------------------------------------------------|---------------------------------------------------------------------------------------------------------------------------------------------------|-------------------------------------------------------------------------|
| 0.280 g; 2.02 mmol  | 4.04 mmol:<br>- Na <sub>2</sub> SO <sub>4</sub> : 0.574 g | 1.1 equiv. → 2.22 mmol:<br>- NMM: 244.4 μL<br>- DBU: 332.4 μL<br>- NaOH: 0.089 g<br>1.3 equiv. → 2.63 mmol:<br>- NMM: 288.8 μL<br>- DBU: 392.8 μL | 2.02 mmol:<br>- Benzaldehyde: 204.2 μL                                  |
| 0.204 g; 1.47 mmol  | 2.94 mmol:<br>- Na <sub>2</sub> SO <sub>4</sub> : 0.418 g | 1.3 equiv. → 1.91 mmol:<br>- NMM: 210.4 μL<br>- DBU: 286.2 μL<br>- NaOH (1.0 equiv.): 0.059 g<br>+ DBU (0.3 equiv.): 66.0 μL                      | 1.47 mmol:<br>- Benzaldehyde: 148.8 μL<br>- o-Tolualdehyde:<br>170.0 μL |
| 0.190 g; 1.37 mmol  | 2.74 mmol:<br>- Na <sub>2</sub> SO <sub>4</sub> : 0.389 g | 1.3 equiv. → 1.78 mmol:<br>- DBU: 266.6 μL                                                                                                        | 1.37 mmol:<br>- o-Tolualdehyde:<br>158.4 μL                             |
| 0.175 g; 1.26 mmol  | 2.52 mmol:<br>- Na <sub>2</sub> SO <sub>4</sub> : 0.359 g | 1.3 equiv. → 1.64 mmol:<br>- DBU: 245.4 μL                                                                                                        | 1.26 mmol:<br>- Benzaldehyde: 127.6 μL                                  |
| 0.150 g; 1.08 mmol  | 2.17 mmol:<br>- Na <sub>2</sub> SO <sub>4</sub> : 0.307 g | 1.3 equiv. → 1.41 mmol:<br>- DBU: 210.4 μL                                                                                                        | 1.08 mmol:<br>- Benzaldehyde: 109.4 μL                                  |
| 0.146 g; 1.05 mmol  | 2.10 mmol:<br>- Na <sub>2</sub> SO <sub>4</sub> : 0.299 g | 1.3 equiv. → 1.37 mmol:<br>- DBU: 204.8 μL                                                                                                        | 1.05 mmol:<br>- Benzaldehyde: 106.4 μL                                  |
| 0.146 g; 0,98 mmol  | 1.96 mmol:<br>- Na <sub>2</sub> SO <sub>4</sub> : 0.279 g | 1.3 equiv. → 1.27 mmol:<br>- DBU: 190.8 μL                                                                                                        | 0.98 mmol:<br>- Benzaldehyde: 113.4 μL                                  |

### 3. Characterization

#### 3.1. <sup>1</sup>H-NMR-Spectra

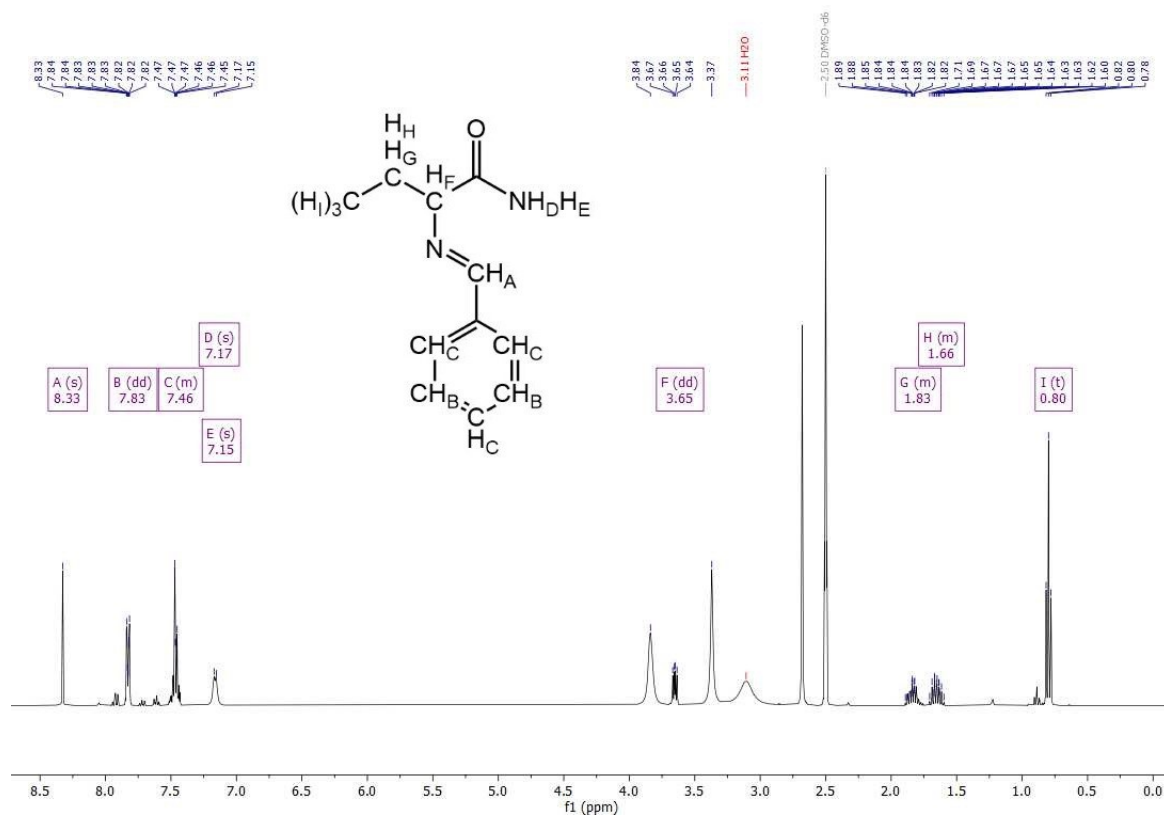

**Figure S1:** <sup>1</sup>H-NMR spectra (400 MHz) in DMSO-d<sub>6</sub> of crude **1a** obtained under S1 condition, recorded directly after milling. Peak labelled in grey (2.50 ppm) corresponds to residual DMSO and peak labelled in red (3.11 ppm) corresponds to residual traces of water.

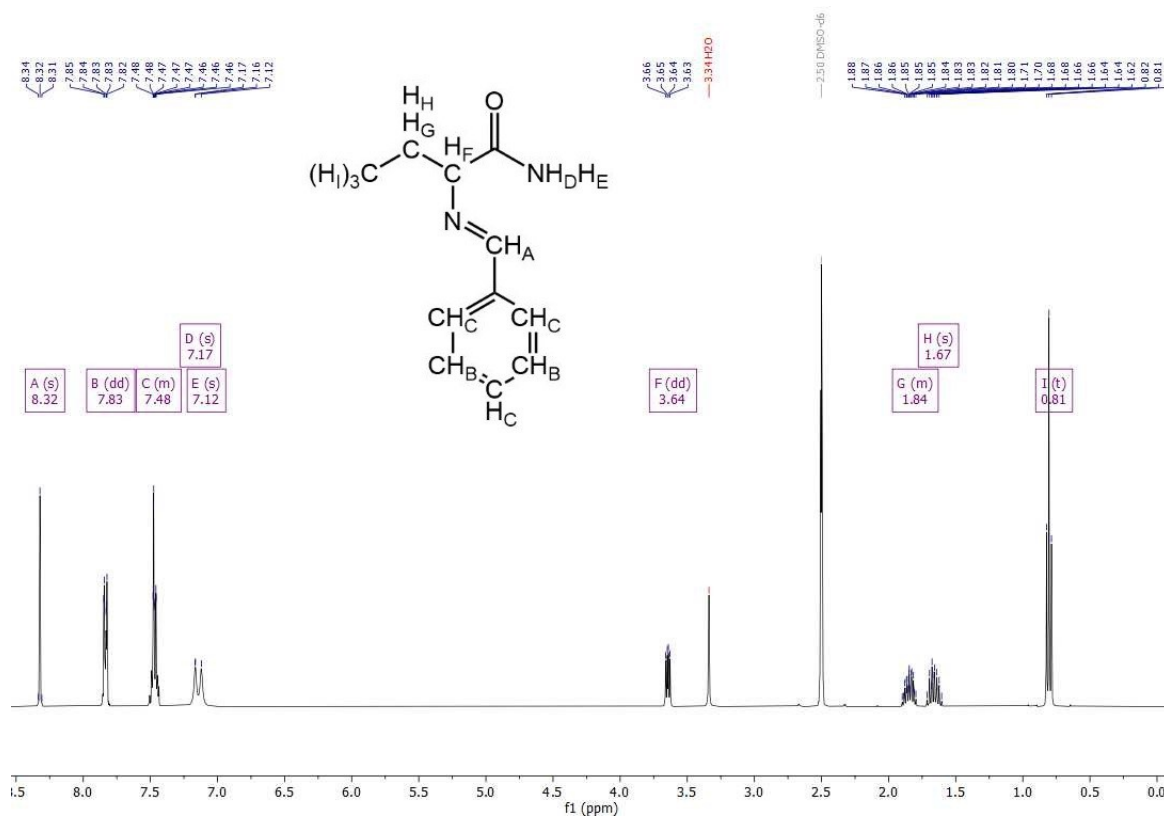

**Figure S2:** <sup>1</sup>H-NMR spectra (400 MHz) in DMSO-d<sub>6</sub> of **1a** obtained under S1 condition, recorded after work-up. Peak labelled in grey (2.50 ppm) corresponds to residual DMSO and peak labelled in red (3.34 ppm) corresponds to residual traces of water.

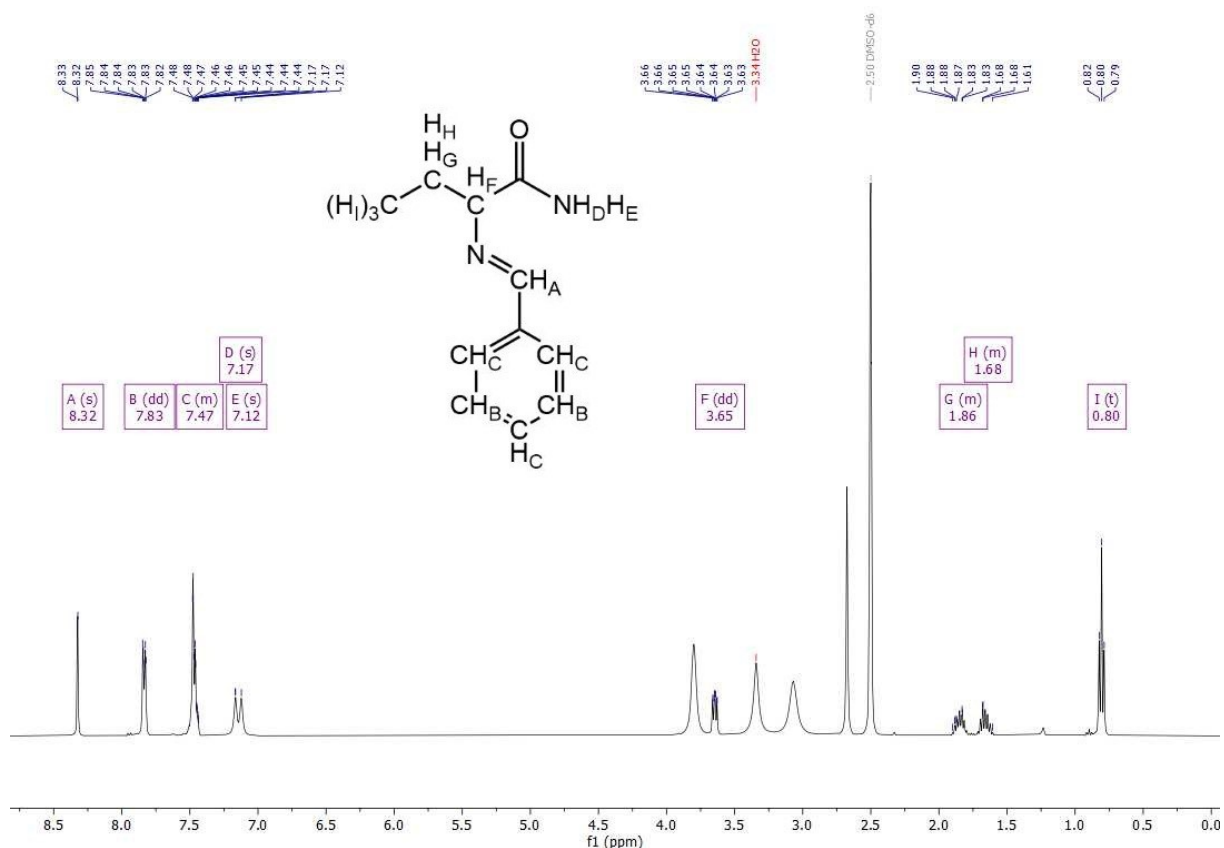

**Figure S3:**  $^1\text{H}$ -NMR spectra (400 MHz) in  $\text{DMSO-d}_6$  of crude **1a** obtained under S2 condition, recorded directly after milling. Peak labelled in grey (2.50 ppm) corresponds to residual DMSO and peak labelled in red (3.34 ppm) corresponds to residual traces of water.

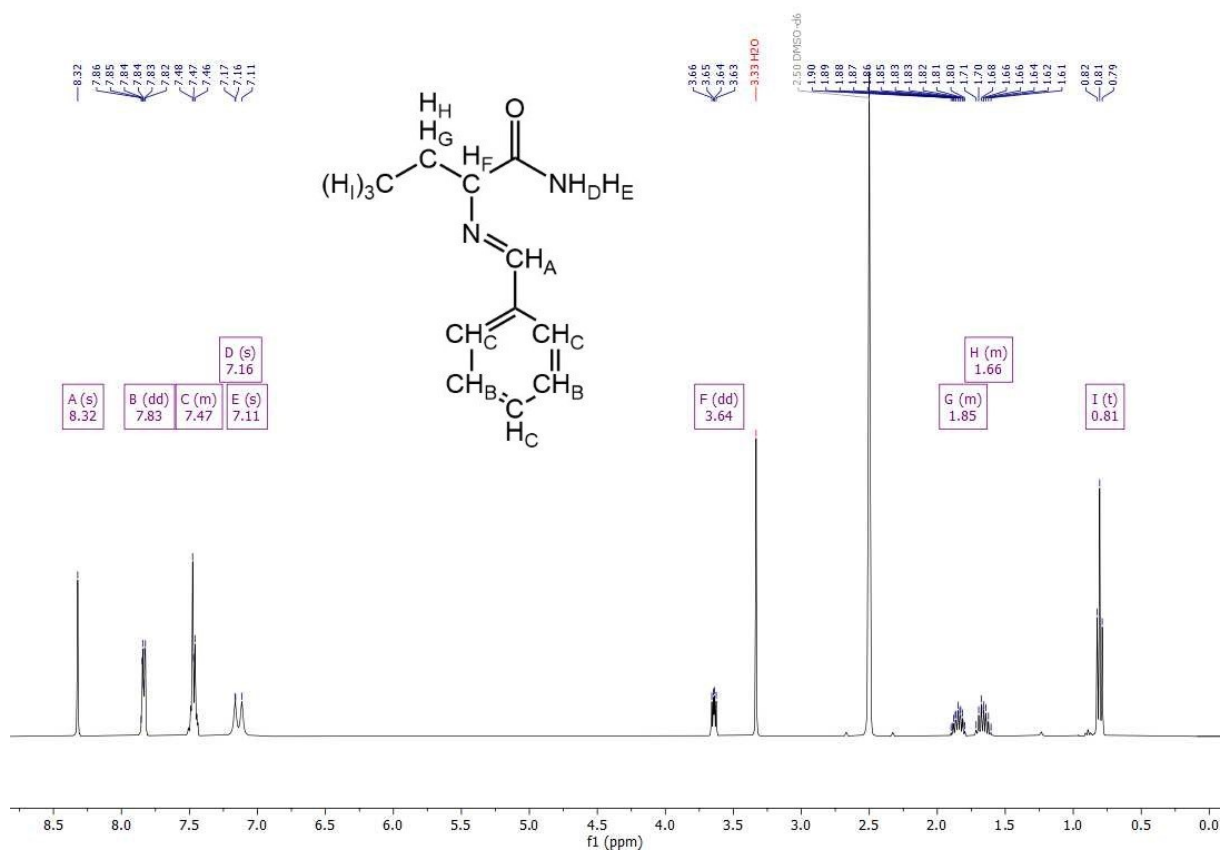

**Figure S4:**  $^1\text{H}$ -NMR spectra (400 MHz) in  $\text{DMSO-d}_6$  of **1a** obtained under S2 condition, recorded after work-up. Peak labelled in grey (2.50 ppm) corresponds to residual DMSO and peak labelled in red (3.33 ppm) corresponds to residual traces of water.

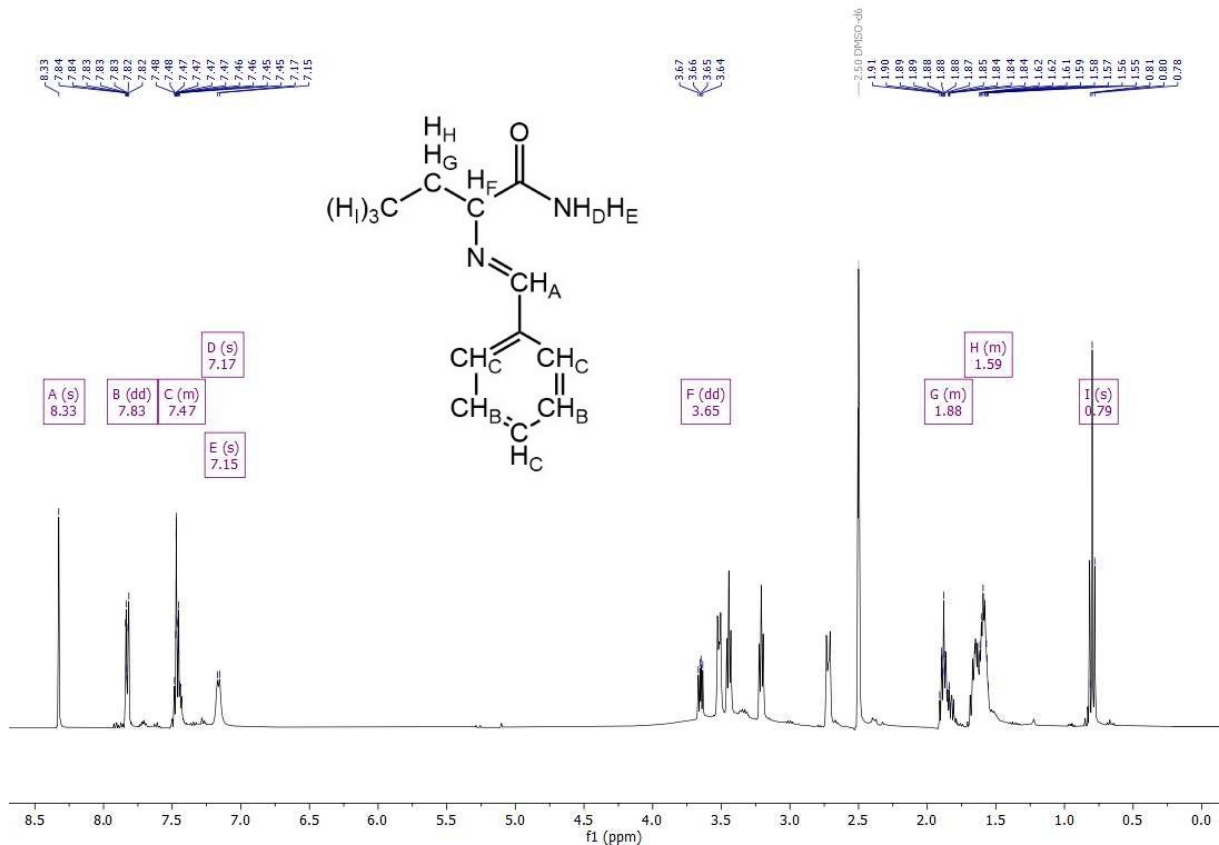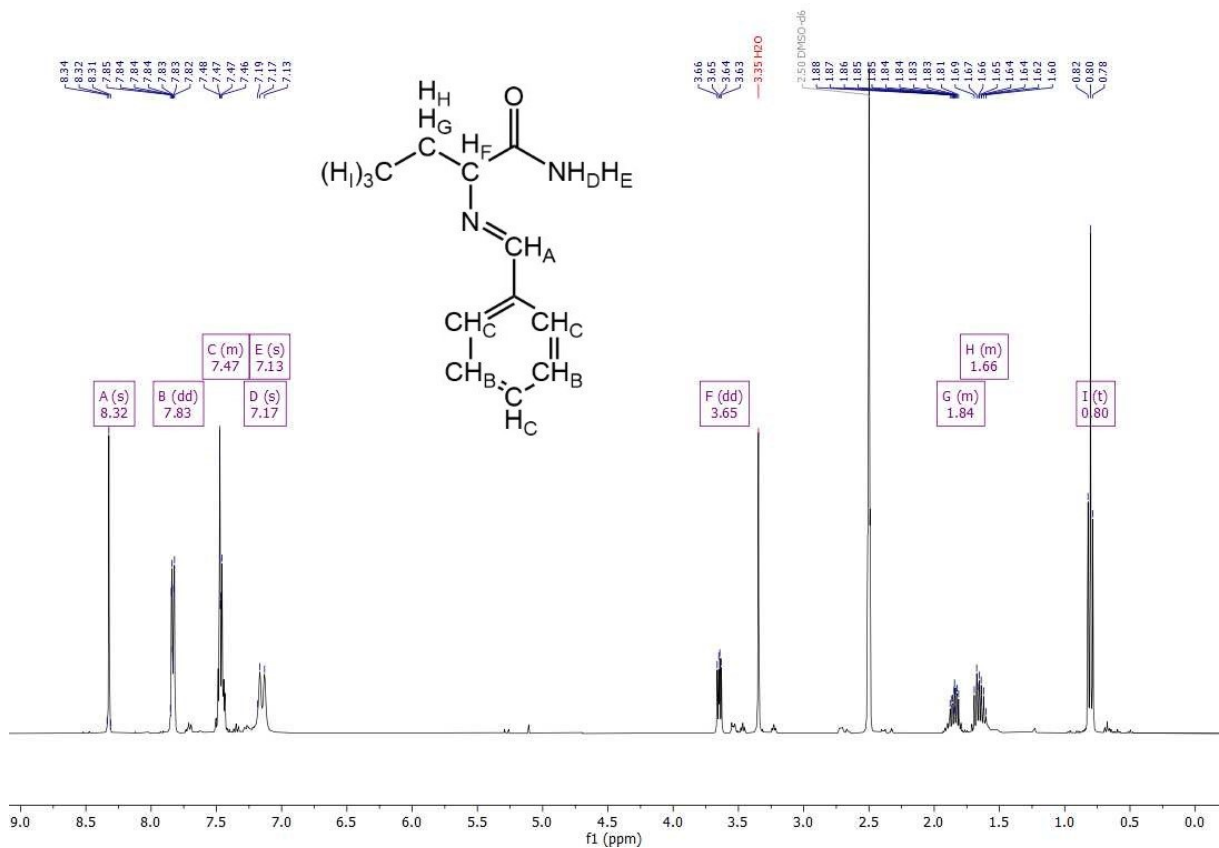

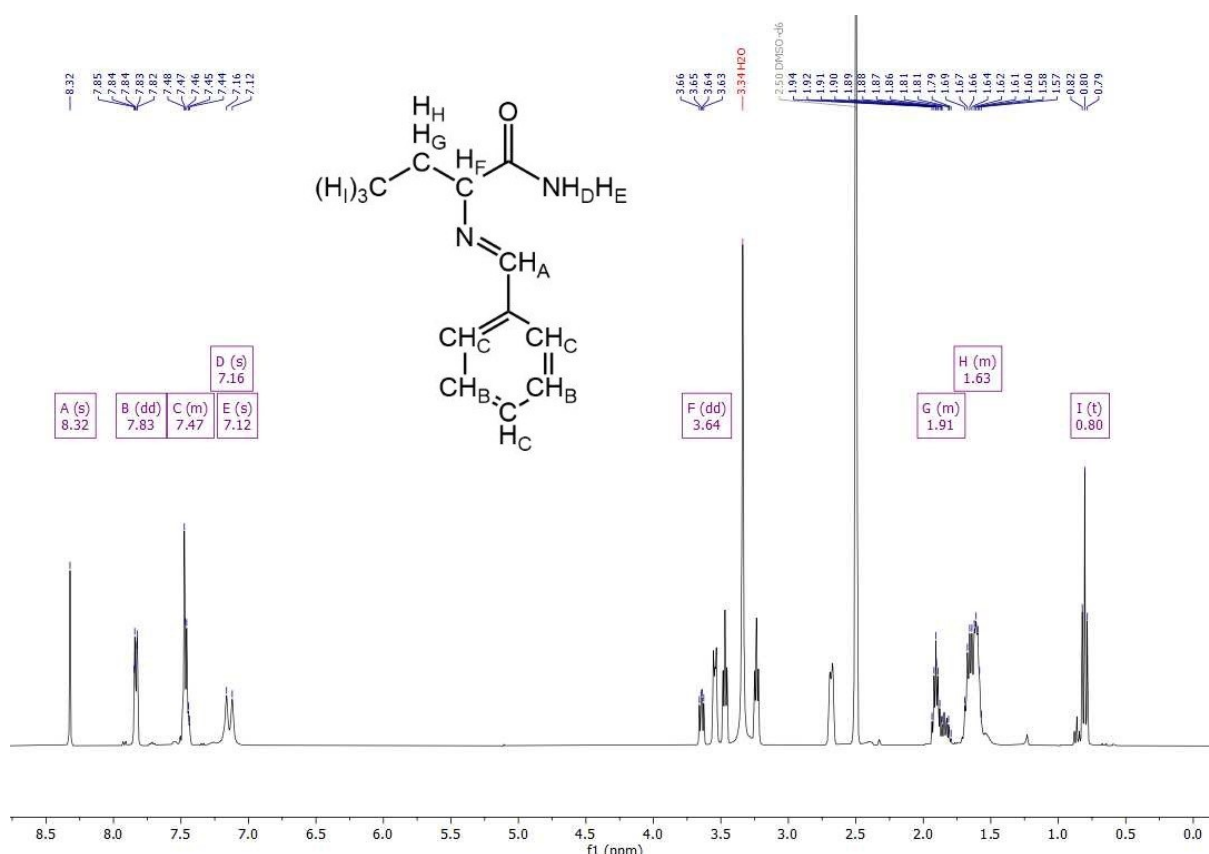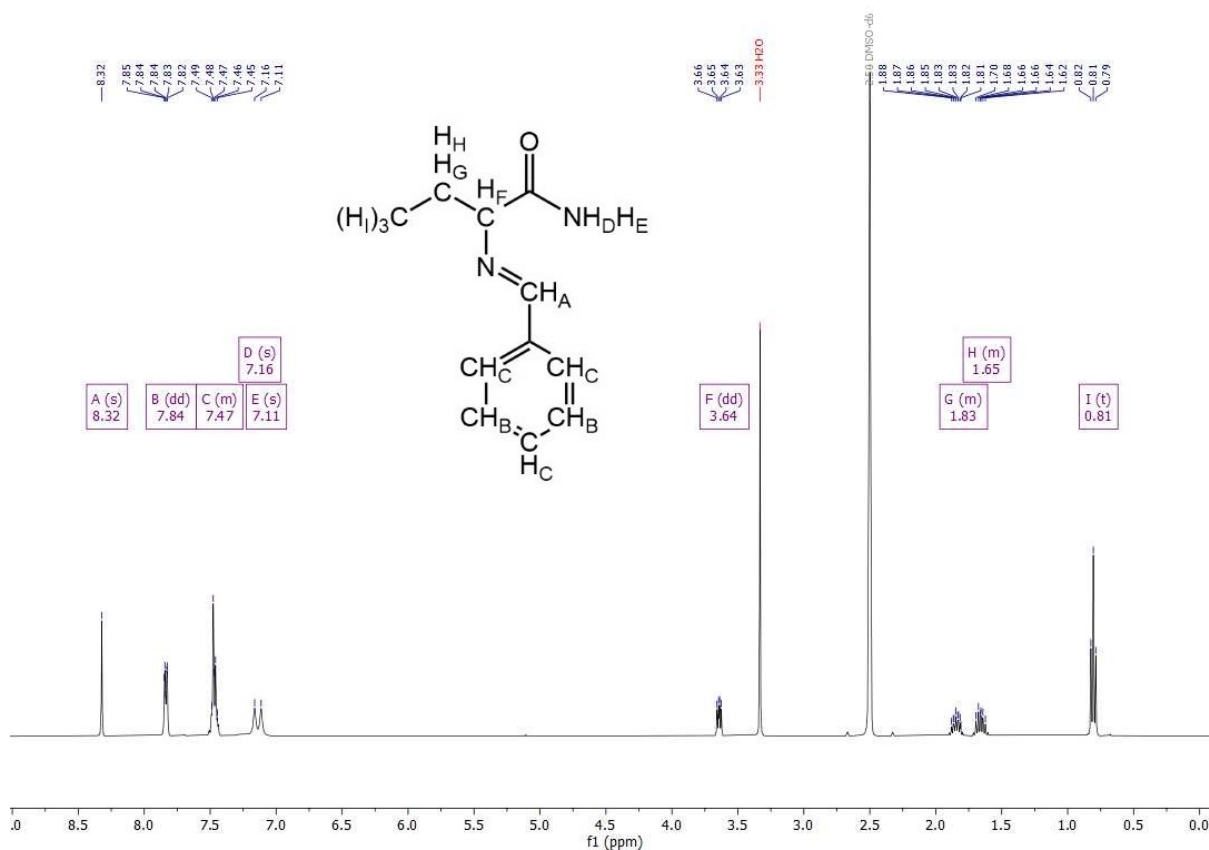

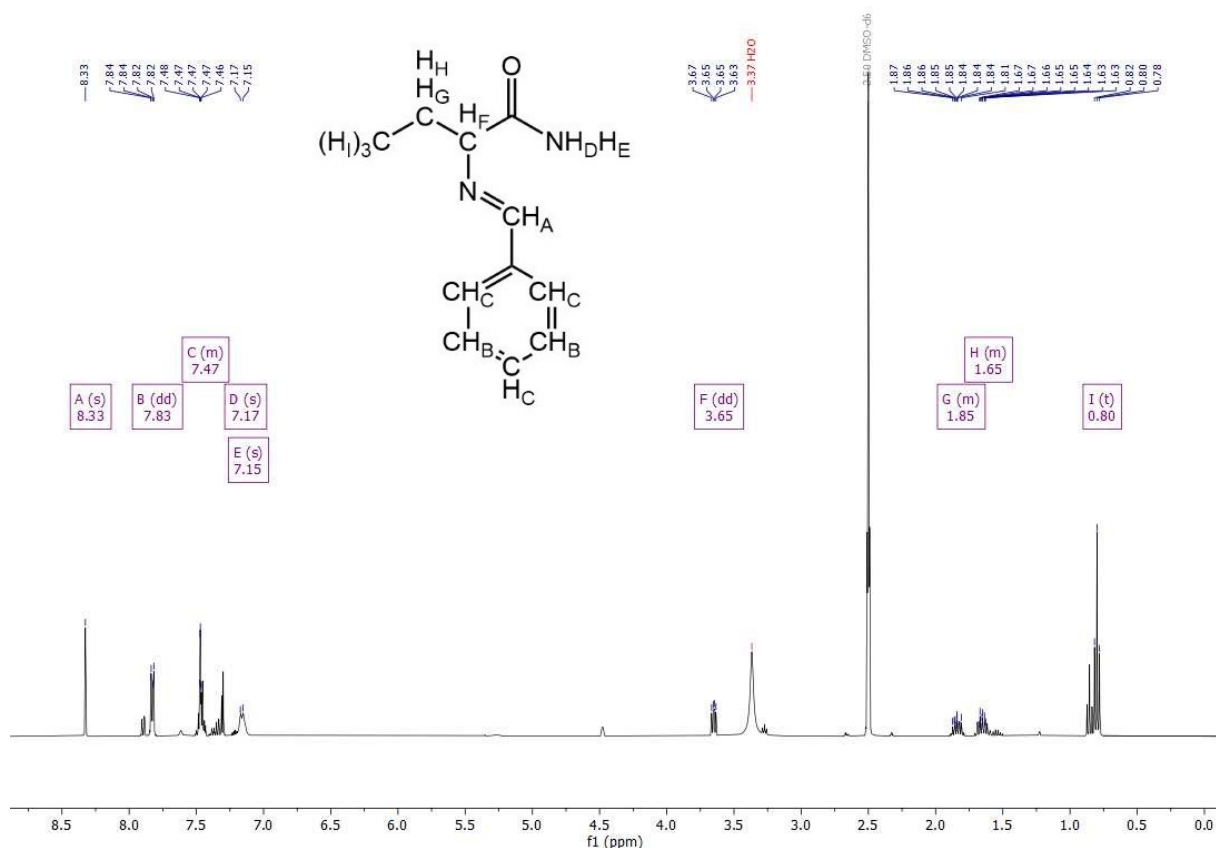

**Figure S9:**  $^1H$ -NMR spectra (400 MHz) in DMSO- $d_6$  of crude **1a** obtained under S5 condition, recorded directly after milling. Peak labelled in grey (2.50 ppm) corresponds to residual DMSO and peak labelled in red (3.37 ppm) corresponds to residual traces of water.

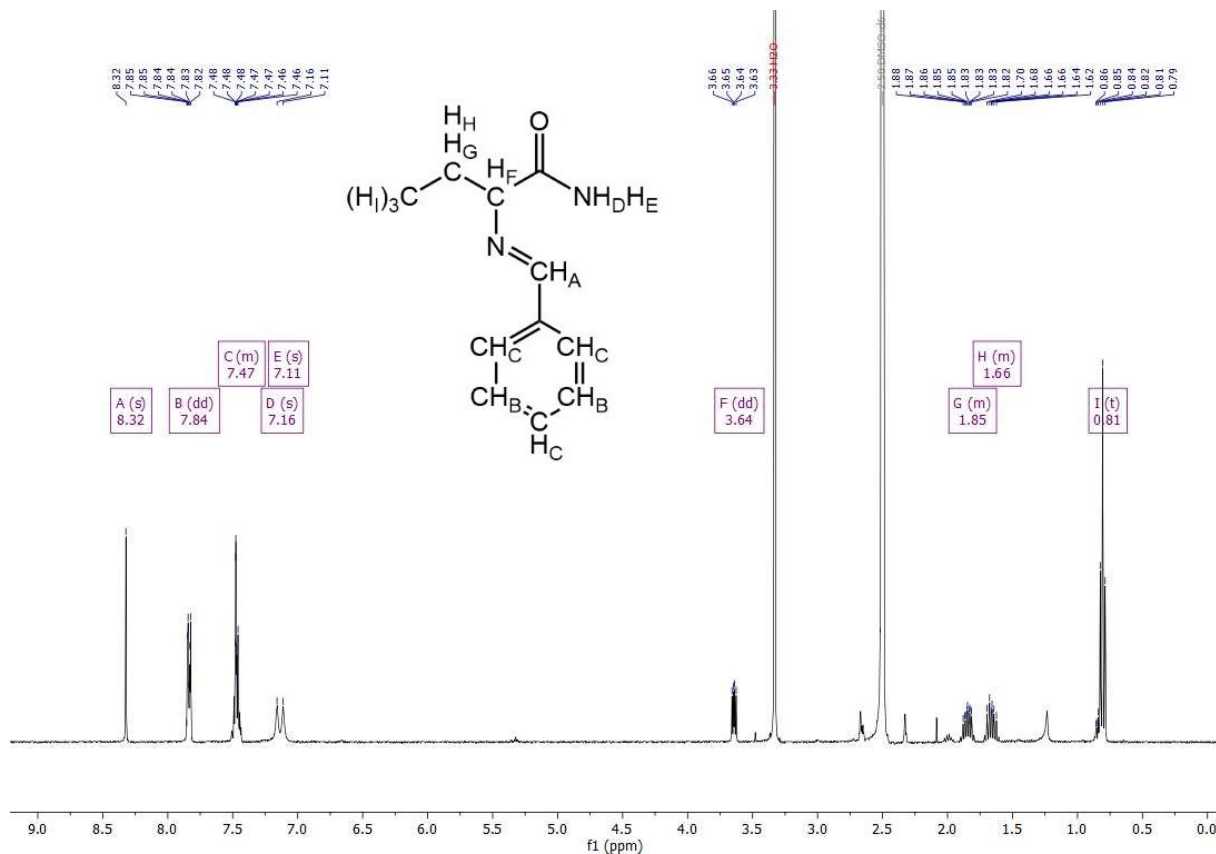

**Figure S10:**  $^1H$ -NMR spectra (400 MHz) in DMSO- $d_6$  of **1a** obtained under S5 condition, recorded after work-up. Peak labelled in grey (2.50 ppm) corresponds to residual DMSO and peak labelled in red (3.33 ppm) corresponds to residual traces of water.



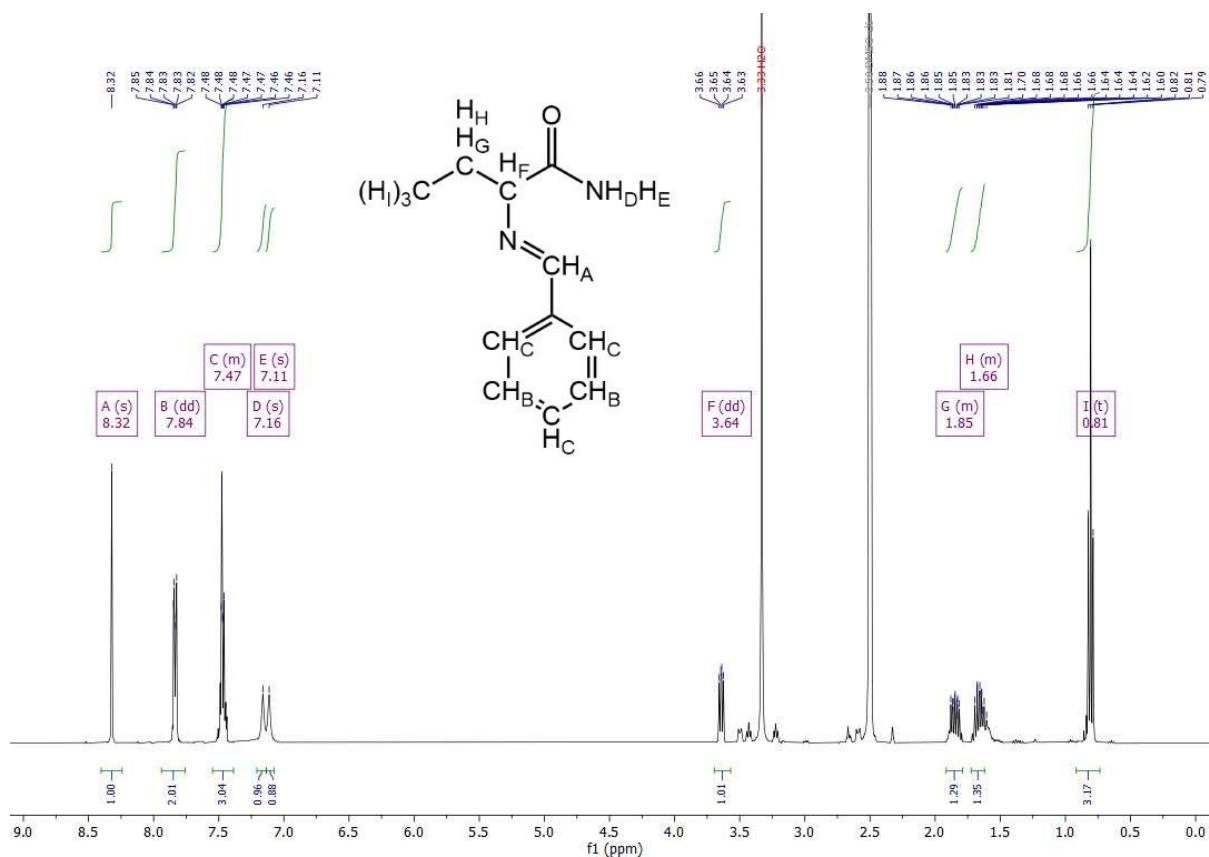

**Figure S13:**  $^1H$ -NMR spectra (400 MHz) in  $DMSO-d_6$  of enantioenriched **1a**, after the A16-1 one-pot synthesis. Peak labelled in grey (2.50 ppm) corresponds to residual DMSO and peak labelled in red (3.33 ppm) corresponds to residual traces of water.

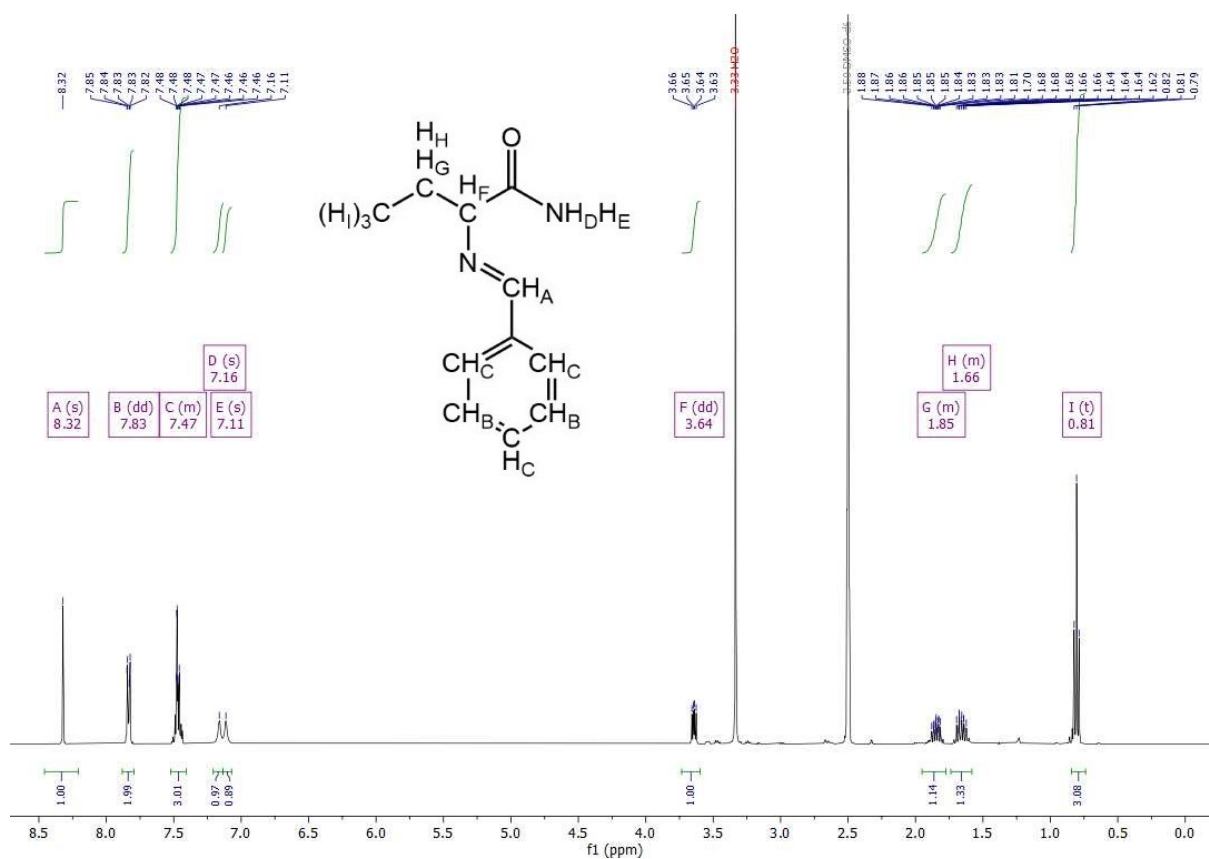

**Figure S14:**  $^1H$ -NMR spectra (400 MHz) in  $DMSO-d_6$  of enantioenriched **1a**, after the A19-1 one-pot synthesis. Peak labelled in grey (2.50 ppm) corresponds to residual DMSO and peak labelled in red (3.33 ppm) corresponds to residual traces of water.

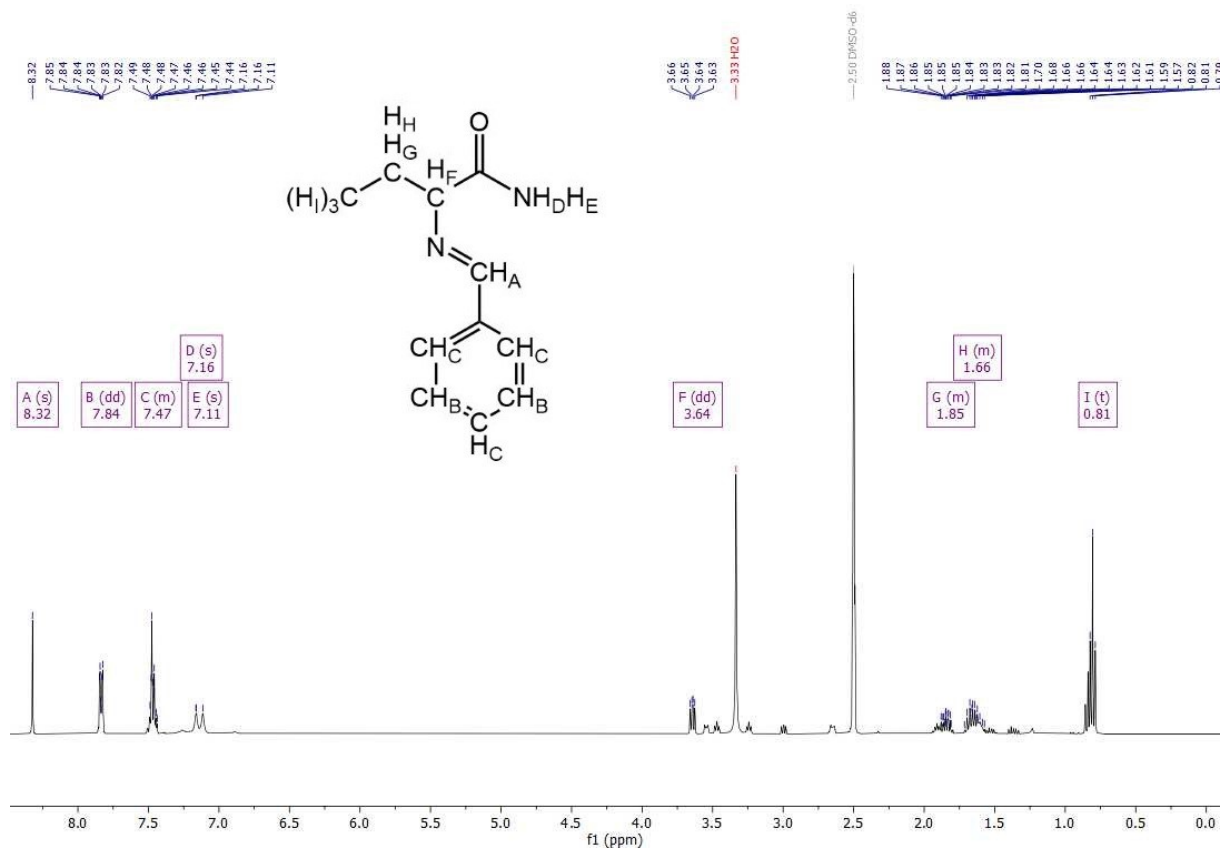

**Figure S15:** <sup>1</sup>H-NMR spectra (400 MHz) in DMSO-d<sub>6</sub> of enantioenriched **1a**, after the A27-2 one-pot synthesis. Peak labelled in grey (2.50 ppm) corresponds to residual DMSO and peak labelled in red (3.33 ppm) corresponds to residual traces of water.

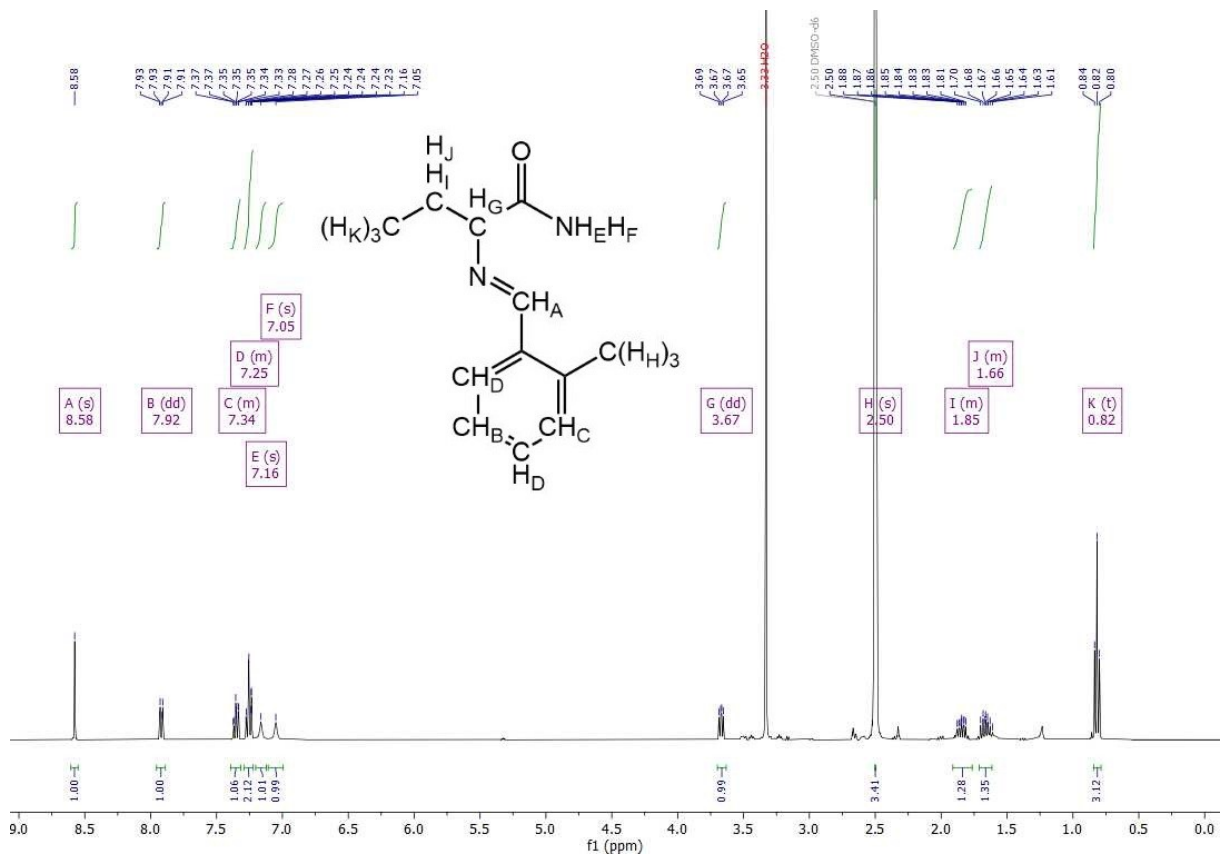

**Figure S16:** <sup>1</sup>H-NMR spectra (400 MHz) in DMSO-d<sub>6</sub> of enantioenriched **1b**, after the B2-2 one-pot synthesis. Peak labelled in grey (2.50 ppm) corresponds to residual DMSO and peak labelled in red (3.33 ppm) corresponds to residual traces of water.

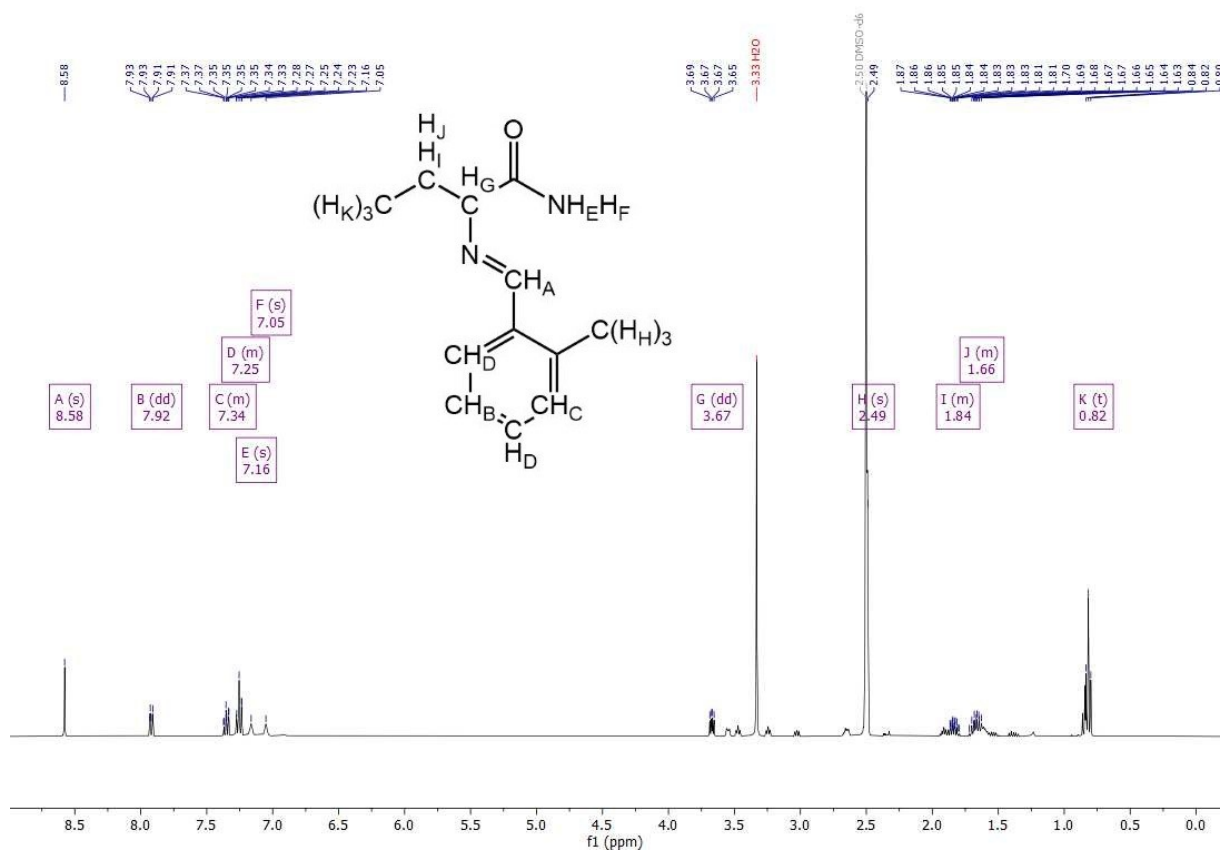

**Figure S17:**  $^1\text{H-NMR}$  spectra (400 MHz) in  $\text{DMSO-d}_6$  of enantioenriched **1b**, after the B3-1 one-pot synthesis. Peak labelled in grey (2.50 ppm) corresponds to residual DMSO and peak labelled in red (3.33 ppm) corresponds to residual traces of water.

### 3.2. cHPLC Analysis

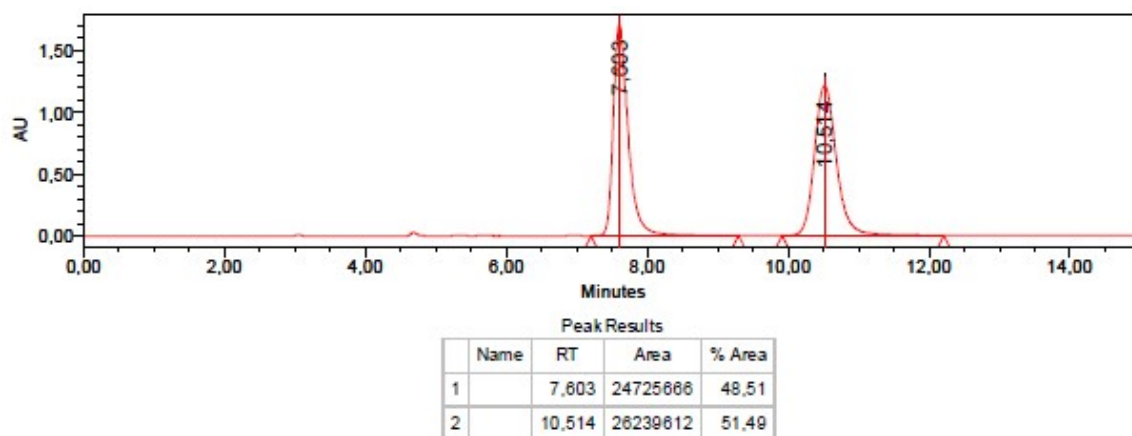

**Figure S18:** cHPLC analysis of (RS)-1a reference. Left peak (n°1 in the table below the chromatogram) represents the (S)-enantiomer (RT: 7.60 min; 48.51%). Right peak (n°2 in the table below the chromatogram) represents the (R)-enantiomer (RT: 10.51 min; 51.49%). The stationary phase is the Chiralpak IA column and the mobile phase is composed of 90% of isohexane and 10% of ethanol.

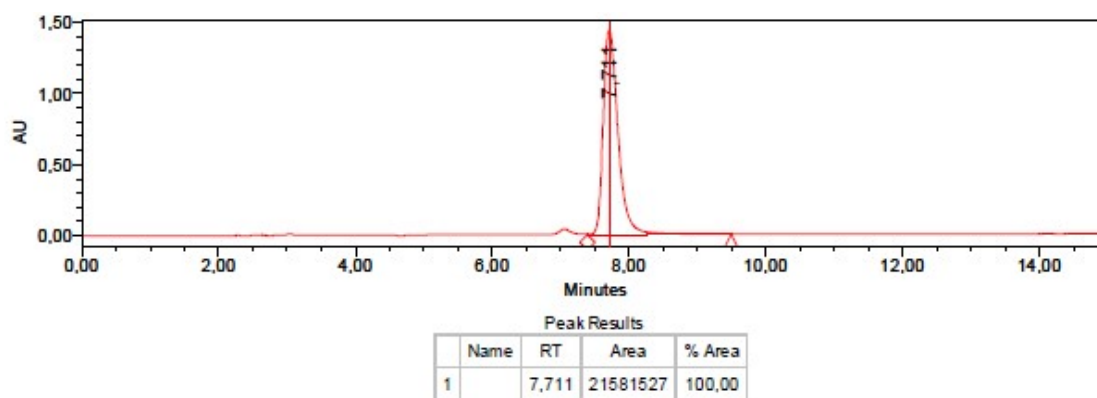

**Figure S19:** cHPLC analysis of (S)-1a reference (RT: 7.71 min; 100%). The stationary phase is the Chiralpak IA column and the mobile phase is composed of 90% of isohexane and 10% of ethanol.

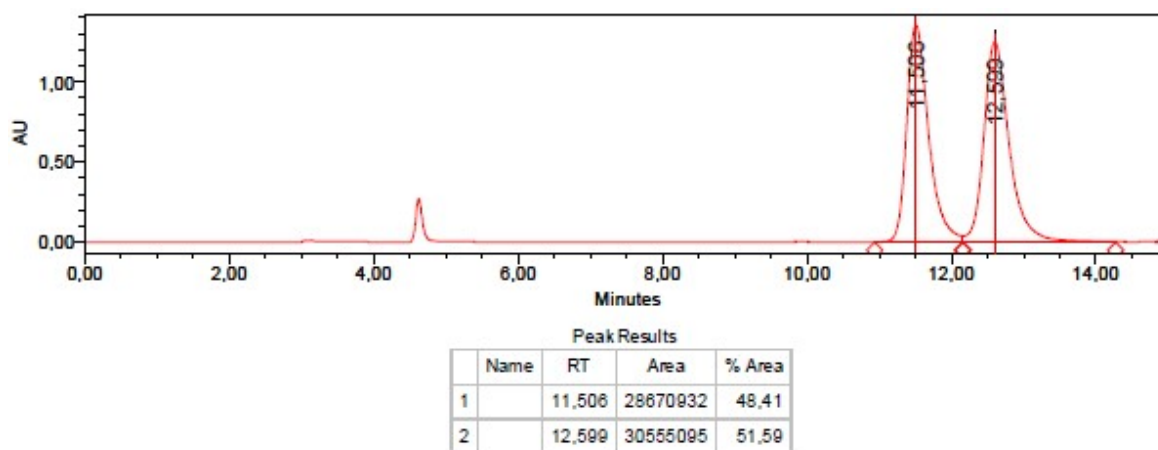

**Figure S20:** cHPLC analysis of (RS)-1b reference. Left peak (n°1 in the table below the chromatogram) represents the (S)-enantiomer (RT: 11.51 min; 48.41%). Right peak (n°2 in the table below the chromatogram) represents the (R)-enantiomer (RT: 12.60 min; 51.59%). The stationary phase is the Chiralpak IA column and the mobile phase is composed of 95% of isohexane and 5% of ethanol.

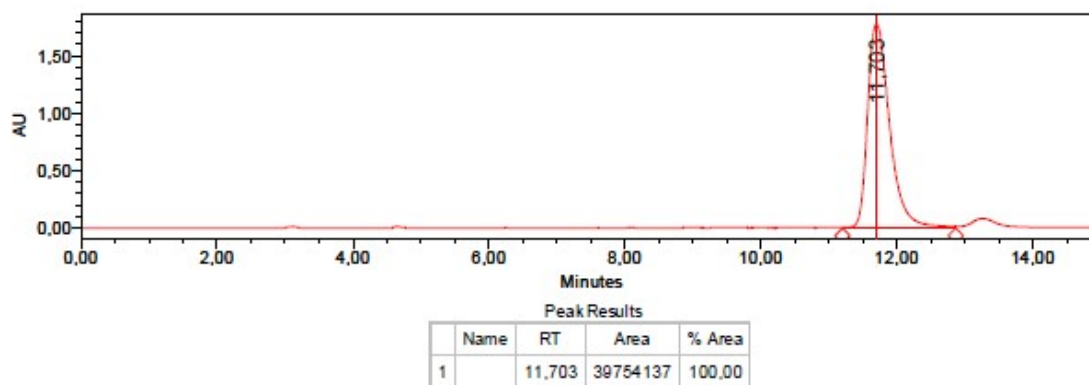

**Figure S21:** cHPLC analysis of (S)-**1b** reference (RT: 11.70 min; 100%). The stationary phase is the Chiralpak IA column and the mobile phase is composed of 95% of isohexane and 5% of ethanol.

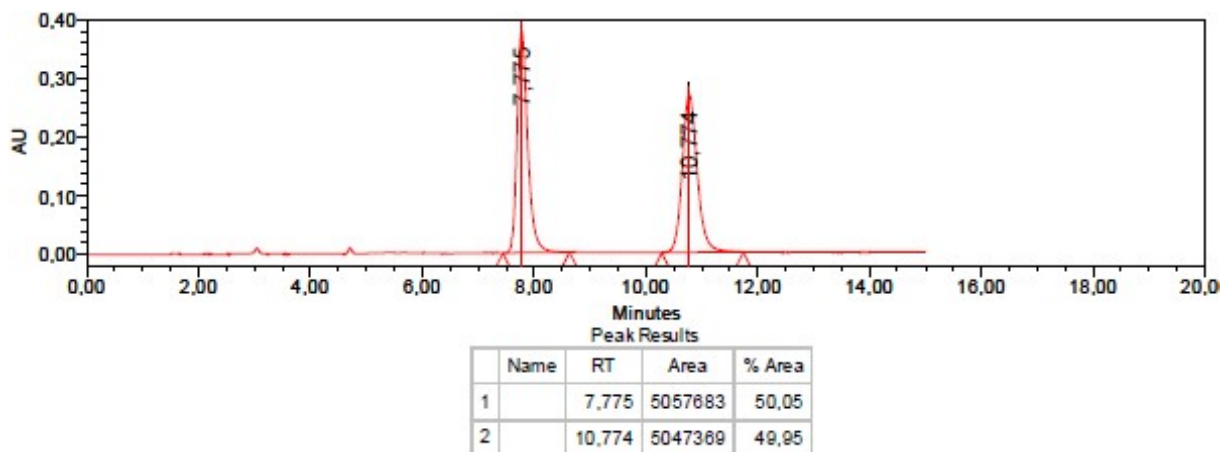

**Figure S22:** cHPLC analysis of **1a** synthesised by milling for 90 min at 30 Hz (Table S1, Method S1). Left peak (n°1 in the table below the chromatogram) represents the (S)-enantiomer (RT: 7.78 min; 50.05%). Right peak (n°2 in the table below the chromatogram) represents the (R)-enantiomer (RT: 10.77 min; 49.95%). The stationary phase is the Chiralpak IA column and the mobile phase is composed of 90% of isohexane and 10% of ethanol.

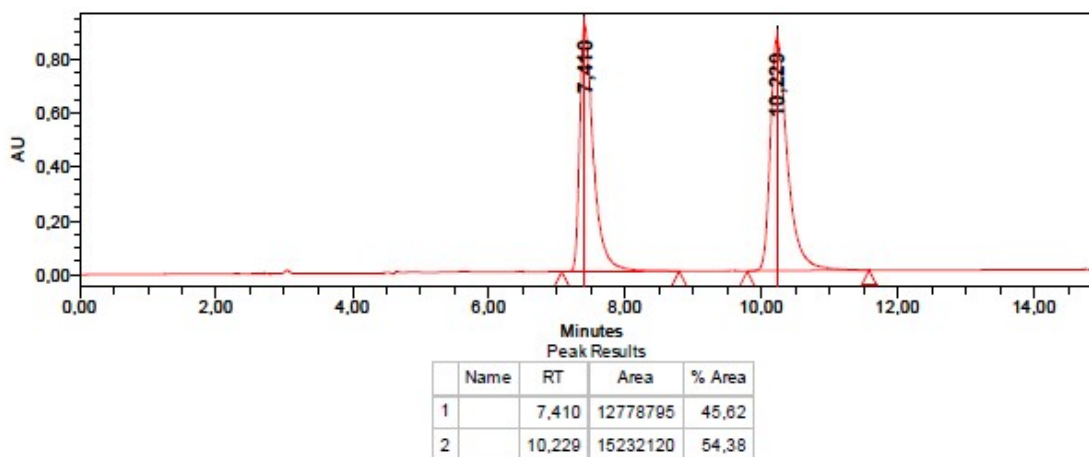

**Figure S23:** cHPLC analysis of **1a** synthesised by milling for 90 min at 30 Hz (Table S1, Method S2). Left peak (n°1 in the table below the chromatogram) represents the (S)-enantiomer (RT: 7.41 min; 45.62%). Right peak (n°2 in the table below the chromatogram) represents the (R)-enantiomer (RT: 10.23 min; 54.38%). The stationary phase is the Chiralpak IA column and the mobile phase is composed of 90% of isohexane and 10% of ethanol.

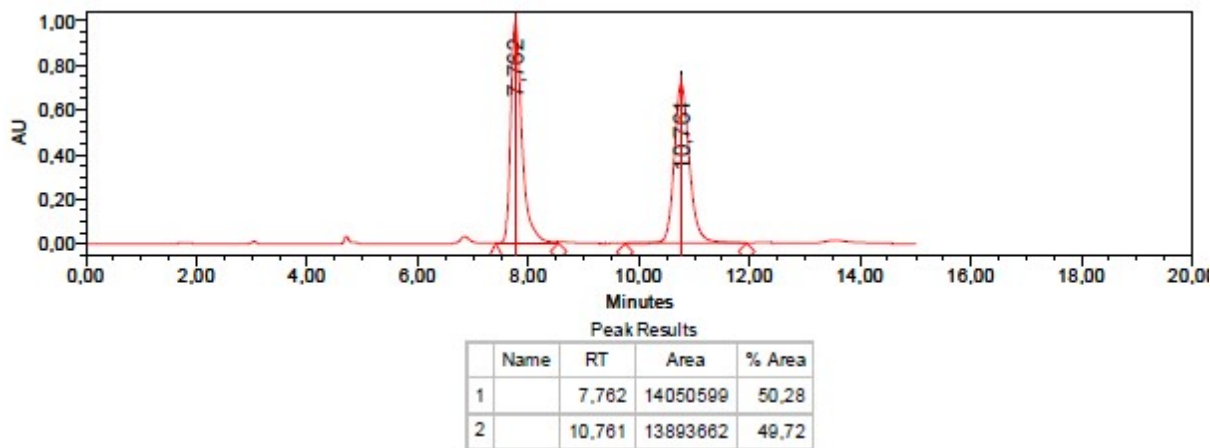

**Figure S24:** chPLC analysis of **1a** synthesised by milling for 90 min at 30 Hz (Table S1, Method S3). Left peak (n°1 in the table below the chromatogram) represents the (*S*)-enantiomer (RT: 7.76 min; 50.28%). Right peak (n°2 in the table below the chromatogram) represents the (*R*)-enantiomer (RT: 10.76 min; 49.72%). The stationary phase is the Chiralpak IA column and the mobile phase is composed of 90% of isohexane and 10% of ethanol.

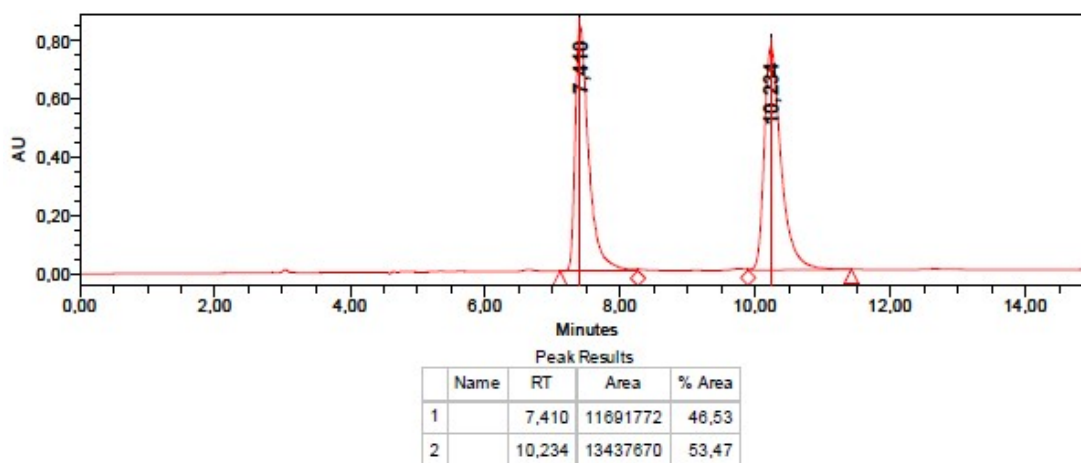

**Figure S25:** chPLC analysis of **1a** synthesised by milling for 90 min at 30 Hz (Table S1, Method S4). Left peak (n°1 in the table below the chromatogram) represents the (*S*)-enantiomer (RT: 7.41 min; 46.53%). Right peak (n°2 in the table below the chromatogram) represents the (*R*)-enantiomer (RT: 10.23 min; 53.47%). The stationary phase is the Chiralpak IA column and the mobile phase is composed of 90% of isohexane and 10% of ethanol.

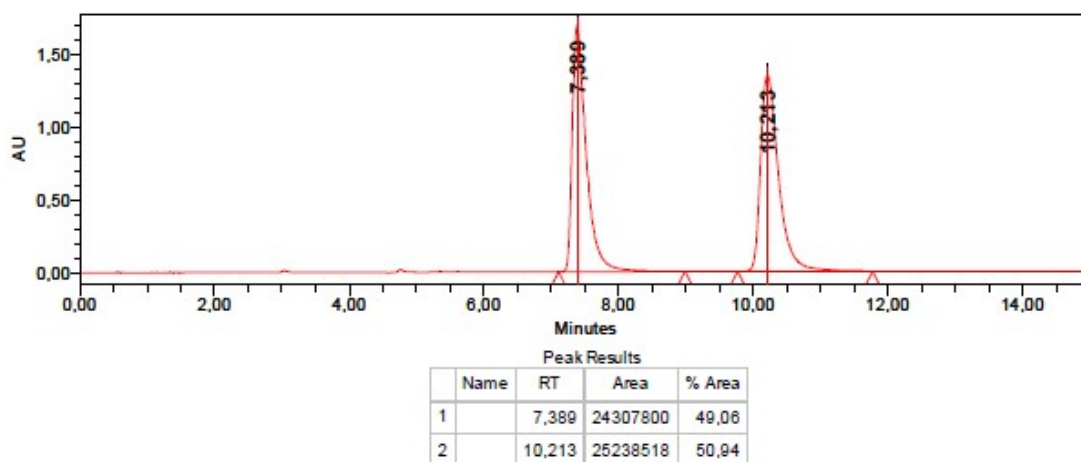

**Figure S26:** chPLC analysis of **1a** synthesised by milling for 90 min at 30 Hz (Table S1, Method S5). Left peak (n°1 in the table below the chromatogram) represents the (*S*)-enantiomer (RT: 7.39 min; 49.06%). Right peak (n°2 in the table below the chromatogram) represents the (*R*)-enantiomer (RT: 10.21 min; 50.94%). The stationary phase is the Chiralpak IA column and the mobile phase is composed of 90% of isohexane and 10% of ethanol.

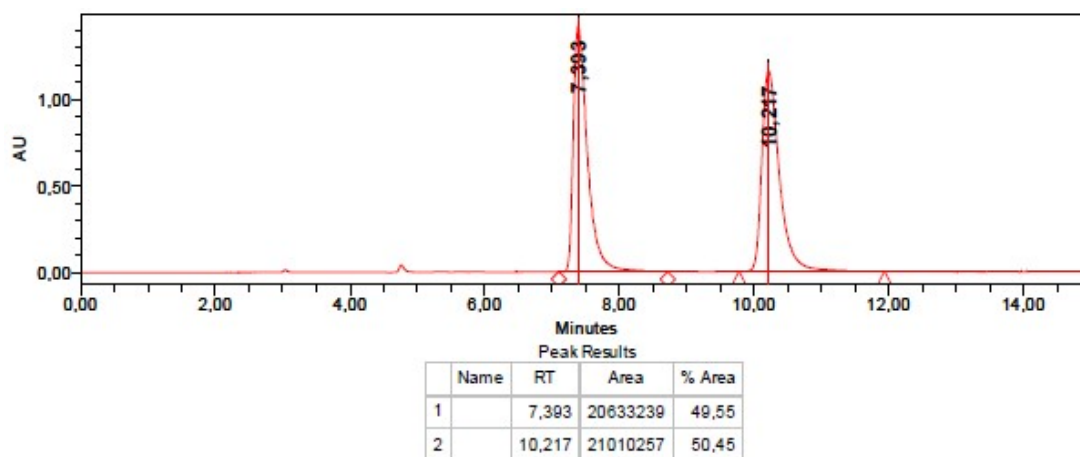

**Figure S27:** cHPLC analysis of **1a** synthesised by milling for 90 min at 30 Hz (Table S1, Method S6). Left peak (n°1 in the table below the chromatogram) represents the (*S*)-enantiomer (RT: 7.39 min; 49.55%). Right peak (n°2 in the table below the chromatogram) represents the (*R*)-enantiomer (RT: 10.22 min; 50.45%). The stationary phase is the Chiralpak IA column and the mobile phase is composed of 90% of isohexane and 10% of ethanol.

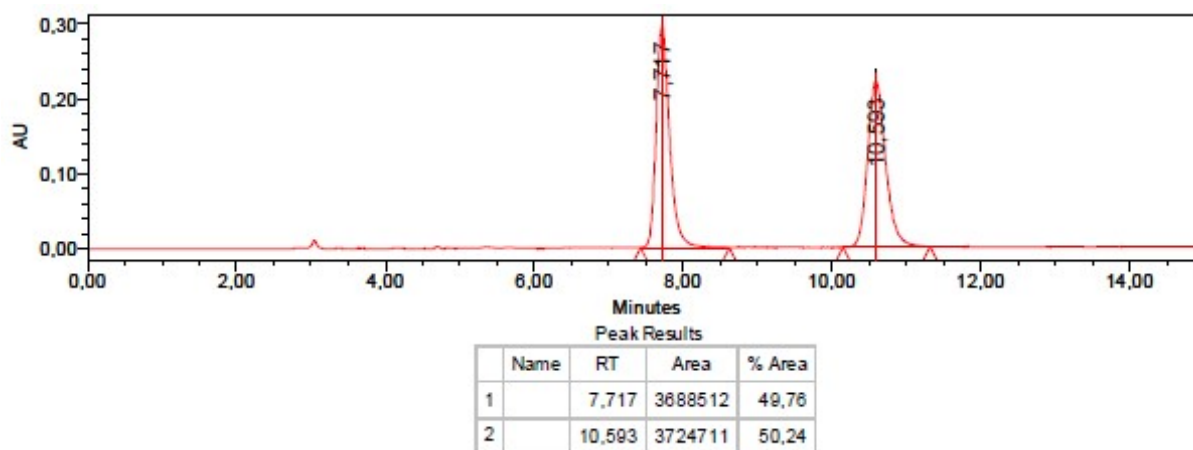

**Figure S28:** cHPLC analysis of **1a** from one-pot synthesis after 24 h milling at 30 Hz (Table S2, Method A1). Left peak (n°1 in the table below the chromatogram) represents the (*S*)-enantiomer (RT: 7.71 min; 49.76%). Right peak (n°2 in the table below the chromatogram) represents the (*R*)-enantiomer (RT: 10.59 min; 50.24%). The stationary phase is the Chiralpak IA column and the mobile phase is composed of 90% of isohexane and 10% of ethanol.

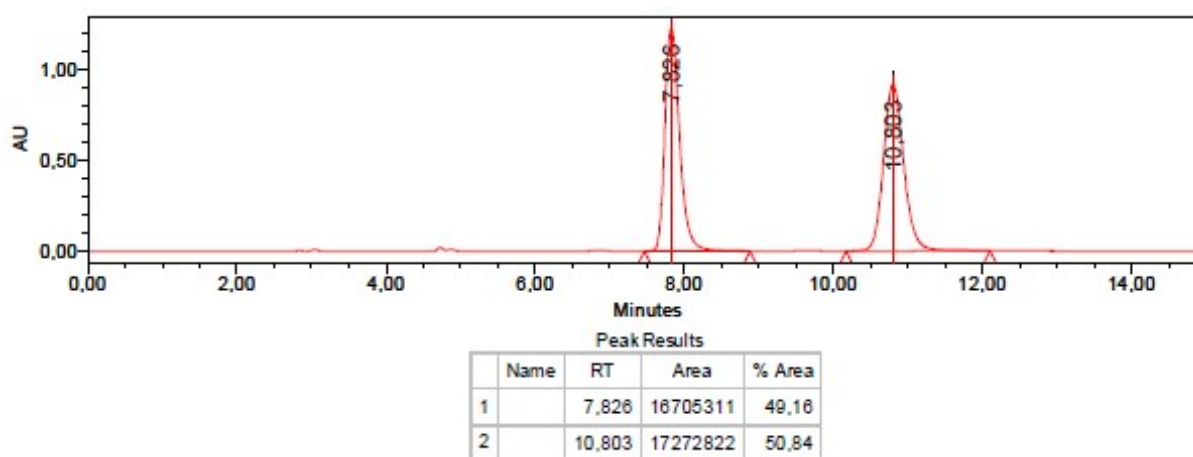

**Figure S29:** cHPLC analysis of **1a** from one-pot synthesis after 24 h milling at 30 Hz (Table S2, Method A2). Left peak (n°1 in the table below the chromatogram) represents the (*S*)-enantiomer (RT: 7.83 min; 49.16%). Right peak (n°2 in the table below the chromatogram) represents the (*R*)-enantiomer (RT: 10.80 min; 50.84%). The stationary phase is the Chiralpak IA column and the mobile phase is composed of 90% of isohexane and 10% of ethanol.

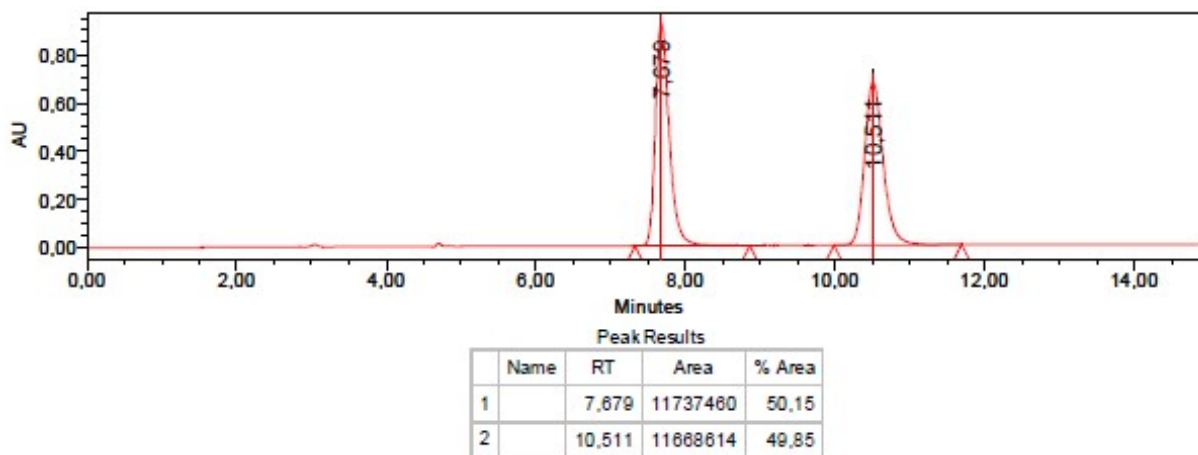

**Figure S30:** cHPLC analysis of **1a** from one-pot synthesis after 24 h milling at 30 Hz (Table S2, Method A3). Left peak (n°1 in the table below the chromatogram) represents the (*S*)-enantiomer (RT: 7.70 min; 50.15%). Right peak (n°2 in the table below the chromatogram) represents the (*R*)-enantiomer (RT: 10.51 min; 49.85%). The stationary phase is the Chiralpak IA column and the mobile phase is composed of 90% of isohexane and 10% of ethanol.

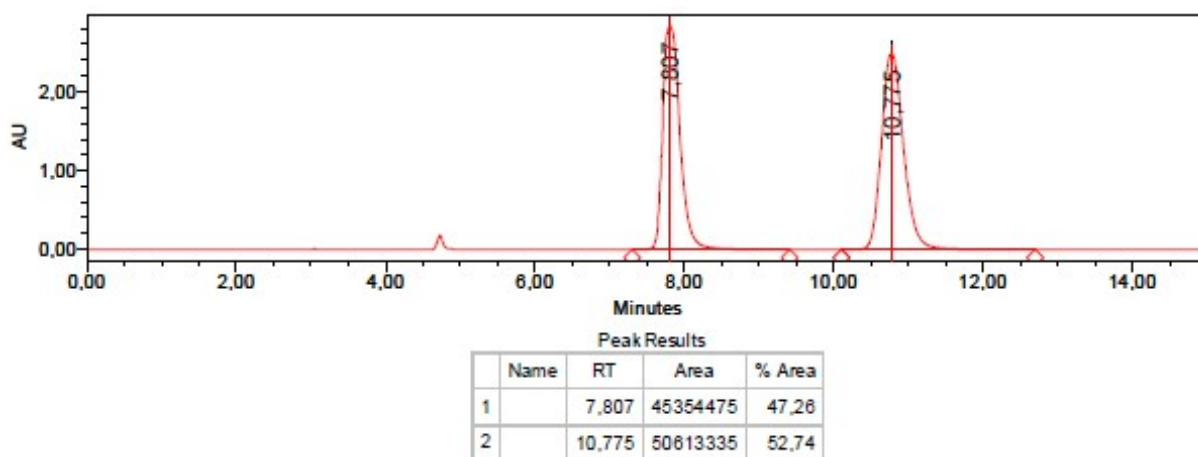

**Figure S31:** cHPLC analysis of **1a** from one-pot synthesis after 24 h milling at 30 Hz (Table S2, Method A4). Left peak (n°1 in the table below the chromatogram) represents the (*S*)-enantiomer (RT: 7.81 min; 47.26%). Right peak (n°2 in the table below the chromatogram) represents the (*R*)-enantiomer (RT: 10.78 min; 52.74%). The stationary phase is the Chiralpak IA column and the mobile phase is composed of 90% of isohexane and 10% of ethanol.

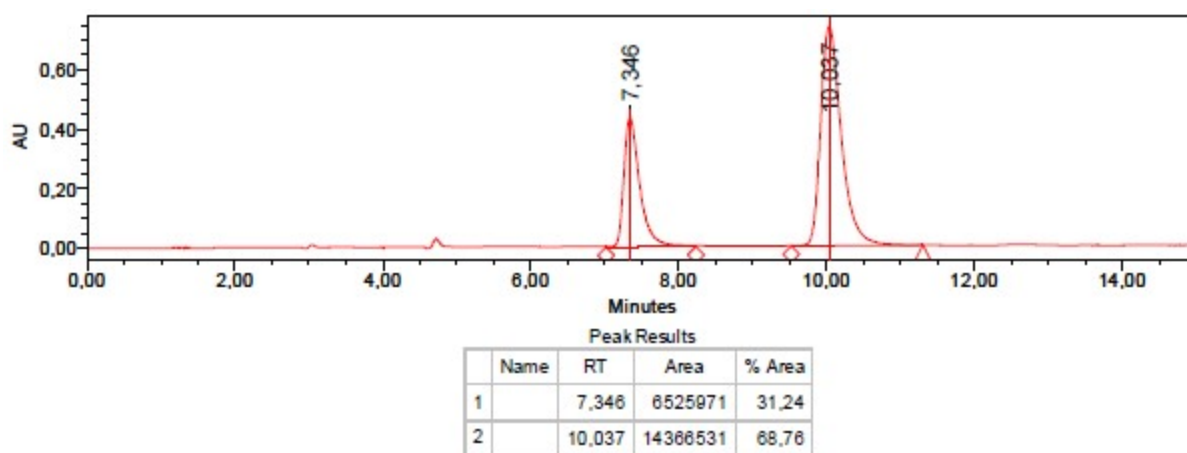

**Figure S32:** cHPLC analysis of **1a** from one-pot synthesis after 24 h milling at 30 Hz (Table S2, Method A5). Left peak (n°1 in the table below the chromatogram) represents the (*S*)-enantiomer (RT: 7.35 min; 31.24%). Right peak (n°2 in the table below the chromatogram) represents the (*R*)-enantiomer (RT: 10.04 min; 68.76%). The stationary phase is the Chiralpak IA column and the mobile phase is composed of 90% of isohexane and 10% of ethanol.

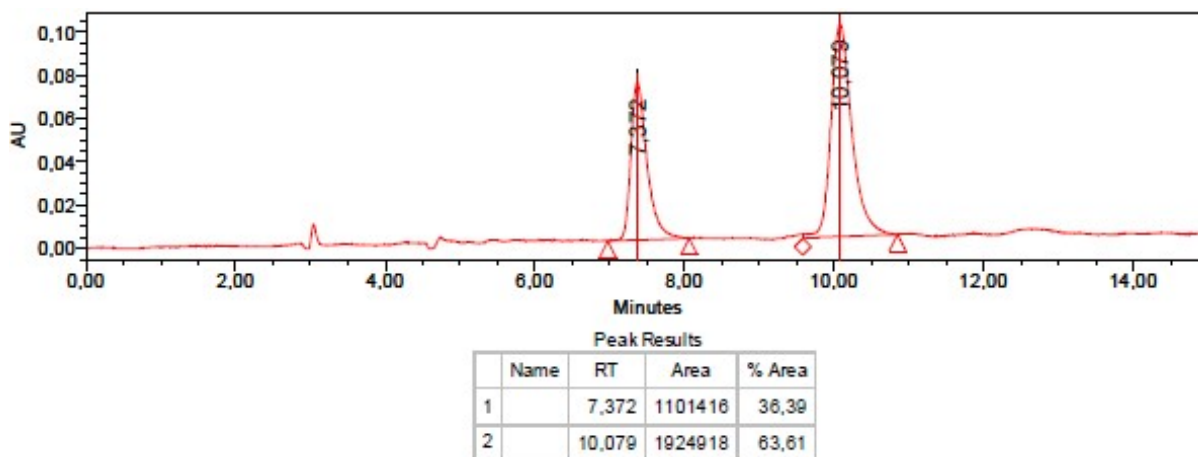

**Figure S33:** cHPLC analysis of **1a** from one-pot synthesis after 24 h milling at 30 Hz (Table S2, Method A6). Left peak (n°1 in the table below the chromatogram) represents the (*S*)-enantiomer (RT: 7.37 min; 36.39%). Right peak (n°2 in the table below the chromatogram) represents the (*R*)-enantiomer (RT: 10.08 min; 63.61%). The stationary phase is the Chiralpak IA column and the mobile phase is composed of 90% of isohexane and 10% of ethanol.

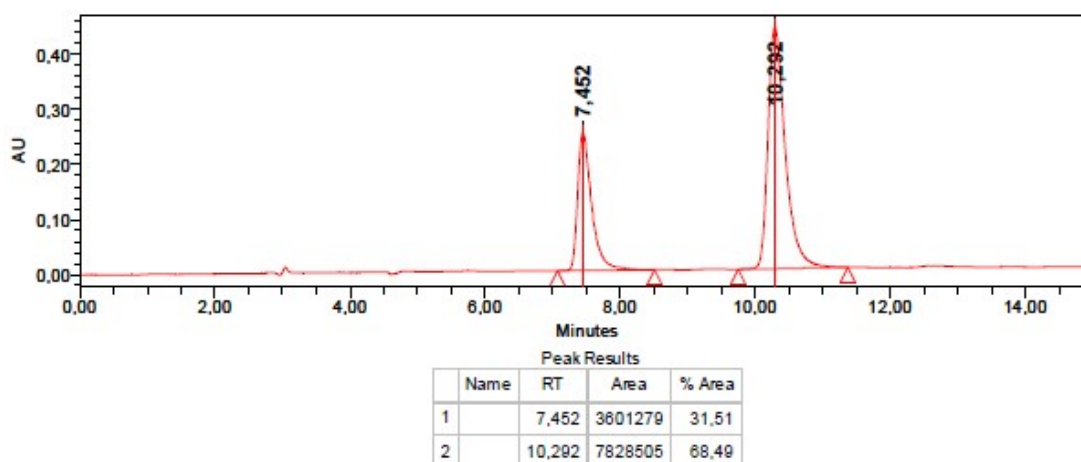

**Figure S34:** cHPLC analysis of **1a** from one-pot synthesis after 24 h milling at 30 Hz (Table S2, Method A7). Left peak (n°1 in the table below the chromatogram) represents the (*S*)-enantiomer (RT: 7.45 min; 31.51%). Right peak (n°2 in the table below the chromatogram) represents the (*R*)-enantiomer (RT: 10.29 min; 68.49%). The stationary phase is the Chiralpak IA column and the mobile phase is composed of 90% of isohexane and 10% of ethanol.

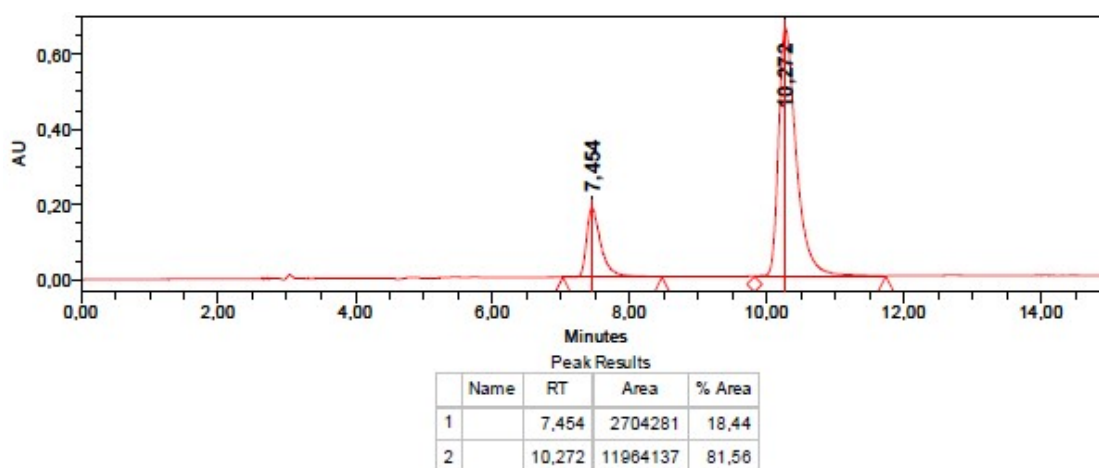

**Figure S35:** cHPLC analysis of **1a** from one-pot synthesis after 24 h milling at 30 Hz (Table S2, Method A8). Left peak (n°1 in the table below the chromatogram) represents the (*S*)-enantiomer (RT: 7.45 min; 18.44%). Right peak (n°2 in the table below the chromatogram) represents the (*R*)-enantiomer (RT: 10.27 min; 81.56%). The stationary phase is the Chiralpak IA column and the mobile phase is composed of 90% of isohexane and 10% of ethanol.

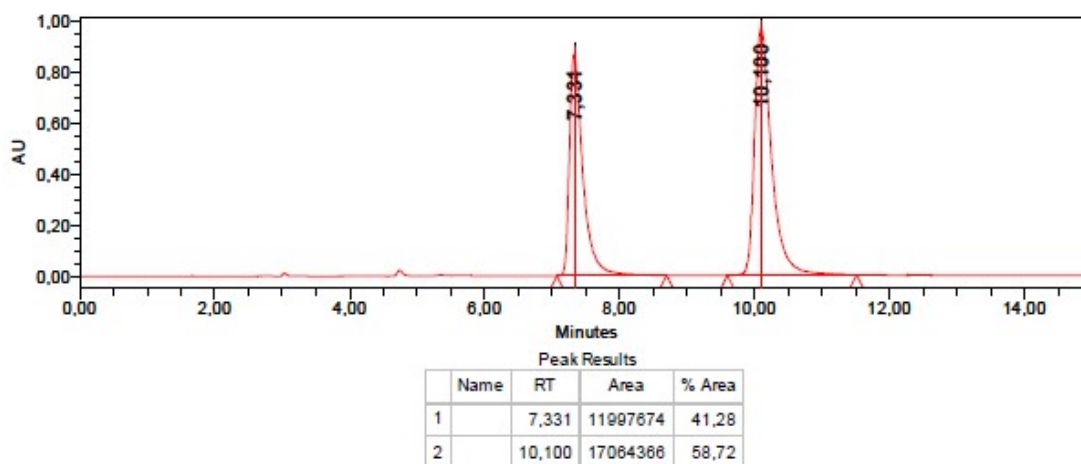

**Figure S36:** chPLC analysis of **1a** from one-pot synthesis after 24 h milling at 30 Hz (Table S2, Method A9). Left peak (n°1 in the table below the chromatogram) represents the (*S*)-enantiomer (RT: 7.33 min; 41.28%). Right peak (n°2 in the table below the chromatogram) represents the (*R*)-enantiomer (RT: 10.10 min; 58.72%). The stationary phase is the Chiralpak IA column and the mobile phase is composed of 90% of isohexane and 10% of ethanol.

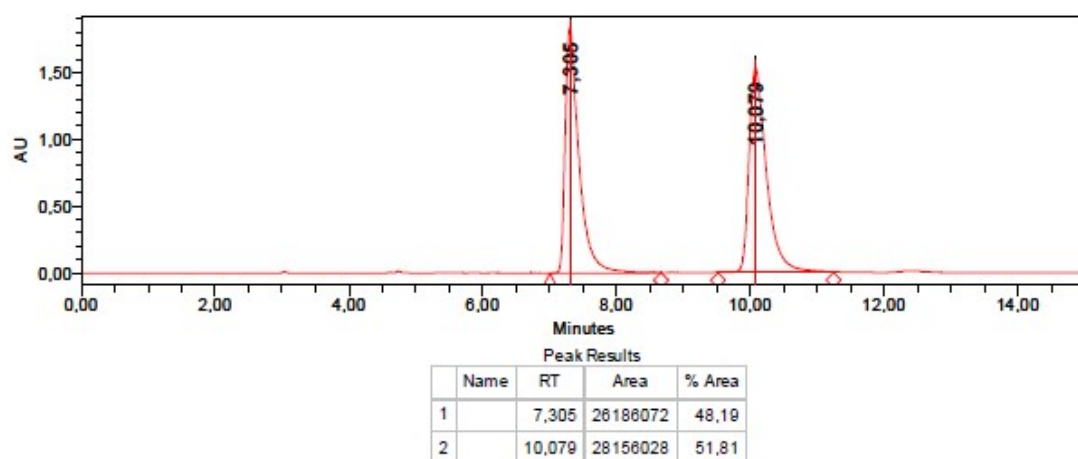

**Figure S37:** chPLC analysis of **1a** from one-pot synthesis after 24 h milling at 30 Hz (Table S2, Method A10). Left peak (n°1 in the table below the chromatogram) represents the (*S*)-enantiomer (RT: 7.31 min; 48.19%). Right peak (n°2 in the table below the chromatogram) represents the (*R*)-enantiomer (RT: 10.08 min; 51.81%). The stationary phase is the Chiralpak IA column and the mobile phase is composed of 90% of isohexane and 10% of ethanol.

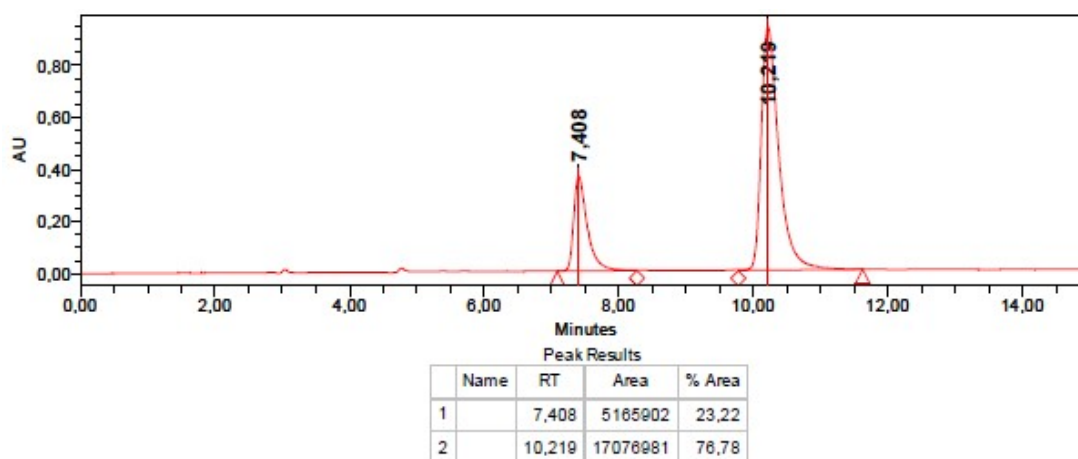

**Figure S38:** chPLC analysis of **1a** from one-pot synthesis after 24 h milling at 30 Hz (Table S2, Method A11). Left peak (n°1 in the table below the chromatogram) represents the (*S*)-enantiomer (RT: 7.41 min; 23.22%). Right peak (n°2 in the table below the chromatogram) represents the (*R*)-enantiomer (RT: 10.22 min; 76.78%). The stationary phase is the Chiralpak IA column and the mobile phase is composed of 90% of isohexane and 10% of ethanol.

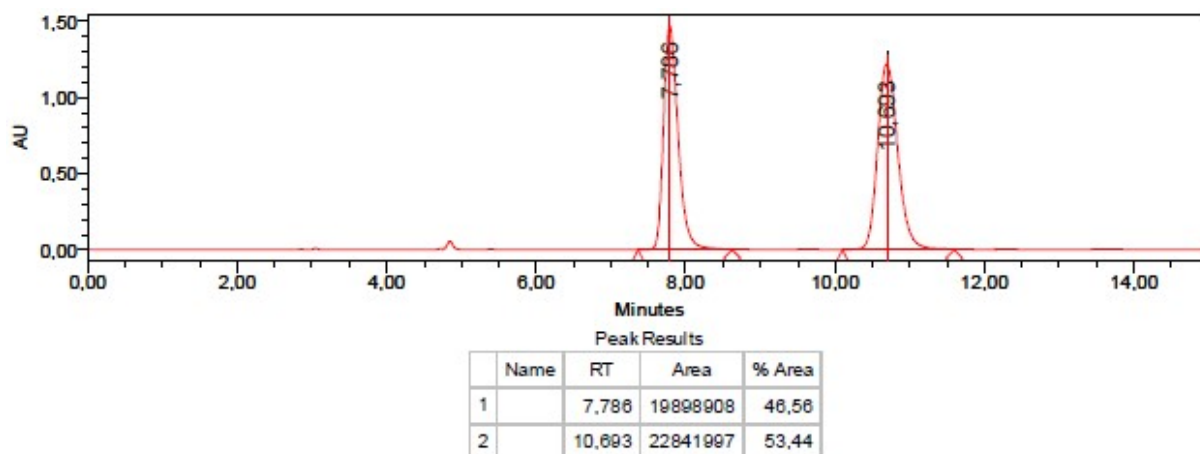

**Figure S39:** chPLC analysis of **1a** from one-pot synthesis after 24 h milling at 30 Hz (Table S2, Method A12). Left peak (n°1 in the table below the chromatogram) represents the (*S*)-enantiomer (RT: 7.79 min; 46.56%). Right peak (n°2 in the table below the chromatogram) represents the (*R*)-enantiomer (RT: 10.69 min; 53.44%). The stationary phase is the Chiralpak IA column and the mobile phase is composed of 90% of isohexane and 10% of ethanol.

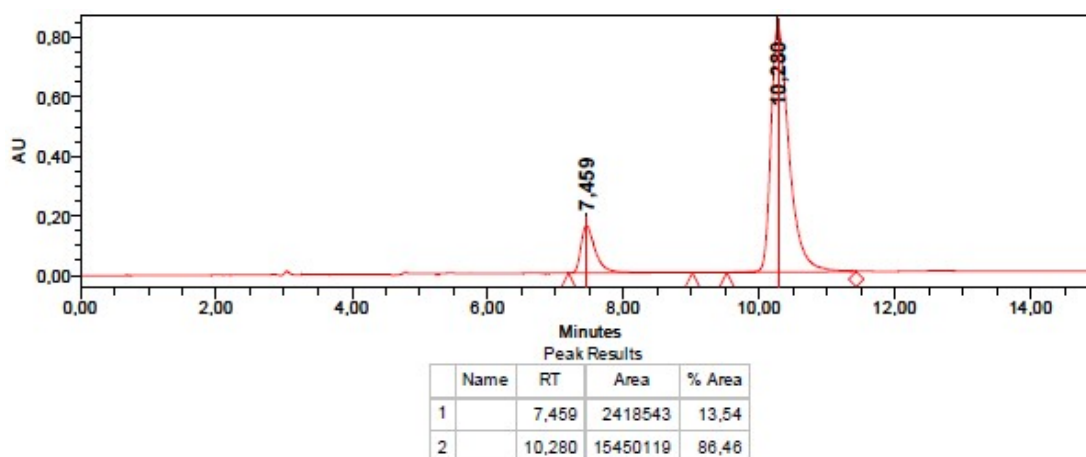

**Figure S40:** chPLC analysis of **1a** from one-pot synthesis after 24 h milling at 30 Hz (Table S2, Method A13). Left peak (n°1 in the table below the chromatogram) represents the (*S*)-enantiomer (RT: 7.46 min; 13.54%). Right peak (n°2 in the table below the chromatogram) represents the (*R*)-enantiomer (RT: 10.28 min; 86.46%). The stationary phase is the Chiralpak IA column and the mobile phase is composed of 90% of isohexane and 10% of ethanol.

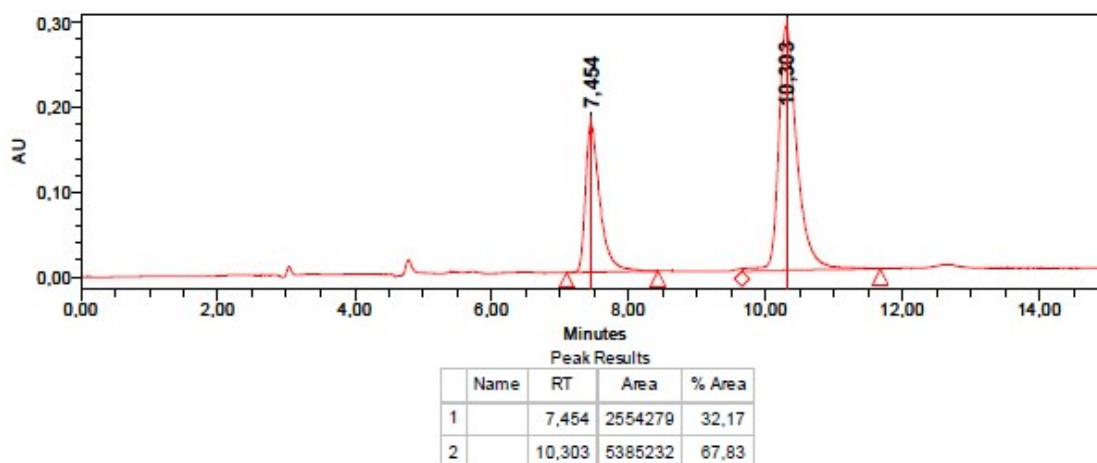

**Figure S41:** chPLC analysis of **1a** from one-pot synthesis after 24 h milling at 30 Hz (Table S2, Method A14). Left peak (n°1 in the table below the chromatogram) represents the (*S*)-enantiomer (RT: 7.45 min; 32.17%). Right peak (n°2 in the table below the chromatogram) represents the (*R*)-enantiomer (RT: 10.30 min; 67.83%). The stationary phase is the Chiralpak IA column and the mobile phase is composed of 90% of isohexane and 10% of ethanol.

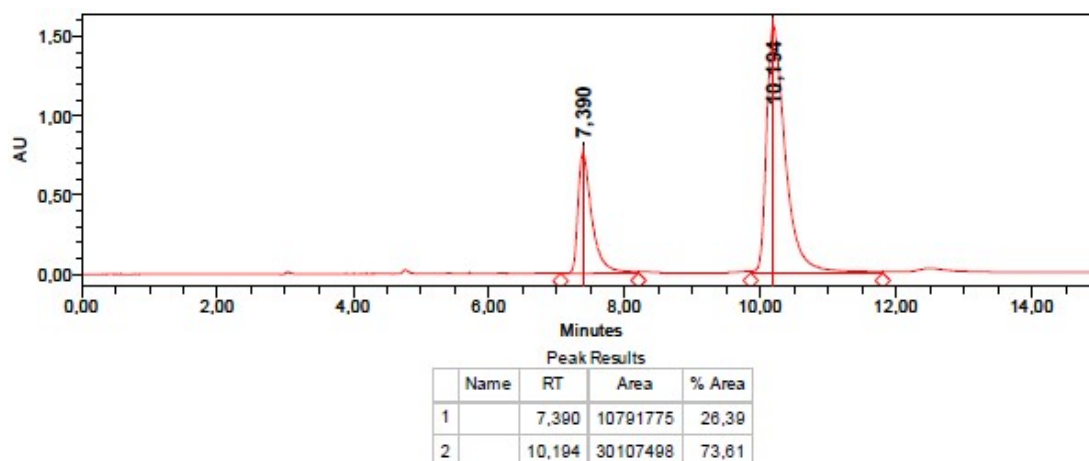

**Figure S42:** chPLC analysis of **1a** from one-pot synthesis after 24 h milling at 30 Hz (Table S2, Method A15). Left peak (n°1 in the table below the chromatogram) represents the (*S*)-enantiomer (RT: 7.39 min; 26.39%). Right peak (n°2 in the table below the chromatogram) represents the (*R*)-enantiomer (RT: 10.19 min; 73.61%). The stationary phase is the Chiralpak IA column and the mobile phase is composed of 90% of isohexane and 10% of ethanol.

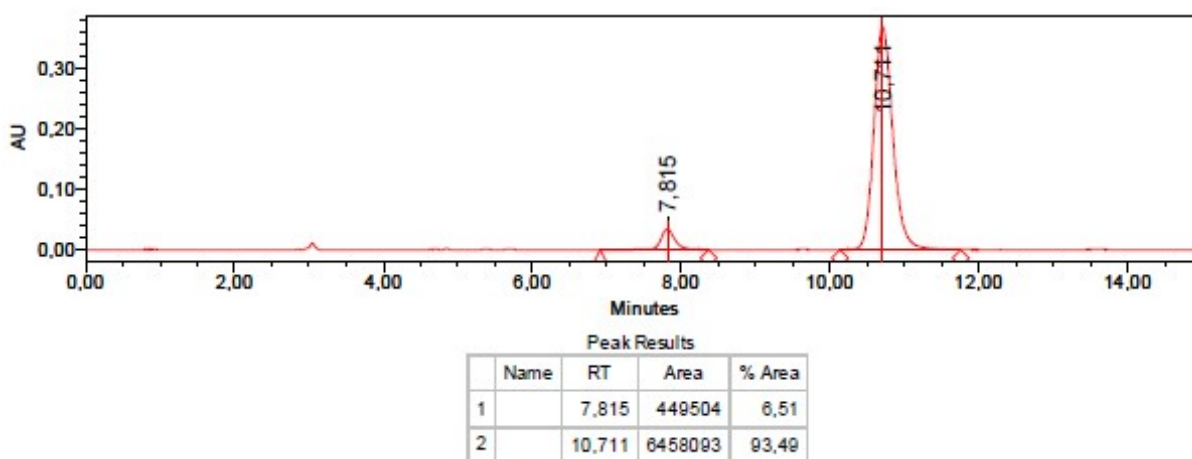

**Figure S43:** chPLC analysis of **1a** from one-pot synthesis after 24 h milling at 30 Hz (Table S2, Method A16-1). Left peak (n°1 in the table below the chromatogram) represents the (*S*)-enantiomer (RT: 7.81 min; 6.51%). Right peak (n°2 in the table below the chromatogram) represents the (*R*)-enantiomer (RT: 10.71 min; 93.49%). The stationary phase is the Chiralpak IA column and the mobile phase is composed of 90% of isohexane and 10% of ethanol.

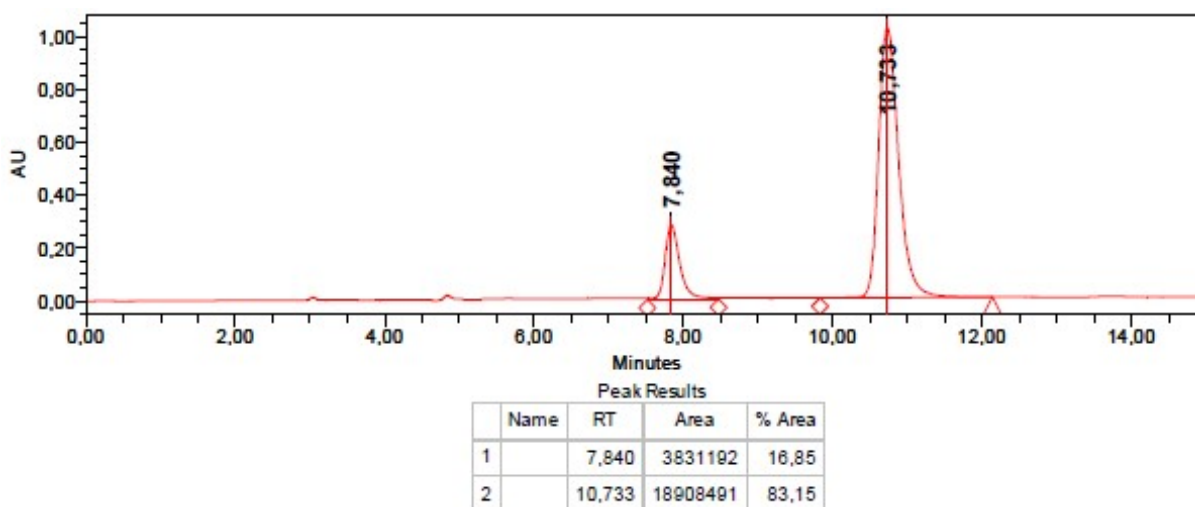

**Figure S44:** chPLC analysis of **1a** from one-pot synthesis after 24 h milling at 30 Hz (Table S2, Method A16-2). Left peak (n°1 in the table below the chromatogram) represents the (*S*)-enantiomer (RT: 7.84 min; 16.85%). Right peak (n°2 in the table below the chromatogram) represents the (*R*)-enantiomer (RT: 10.73 min; 83.15%). The stationary phase is the Chiralpak IA column and the mobile phase is composed of 90% of isohexane and 10% of ethanol.

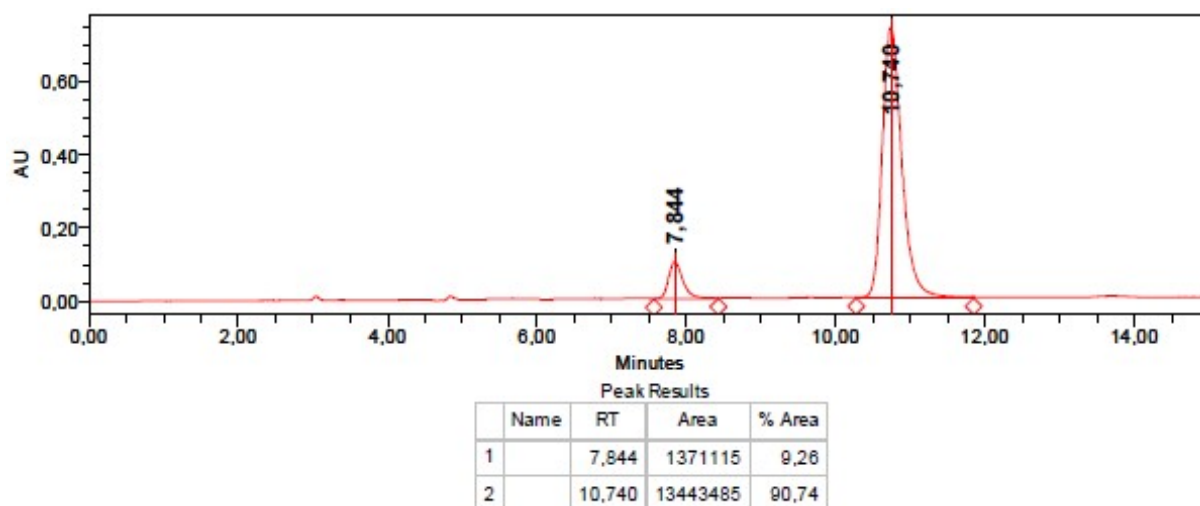

**Figure S45:** chPLC analysis of **1a** from one-pot synthesis after 24 h milling at 30 Hz (Table S2, Method A16-3). Left peak (n°1 in the table below the chromatogram) represents the (*S*)-enantiomer (RT: 7.84 min; 9.26%). Right peak (n°2 in the table below the chromatogram) represents the (*R*)-enantiomer (RT: 10.74 min; 90.74%). The stationary phase is the Chiralpak IA column and the mobile phase is composed of 90% of isohexane and 10% of ethanol.

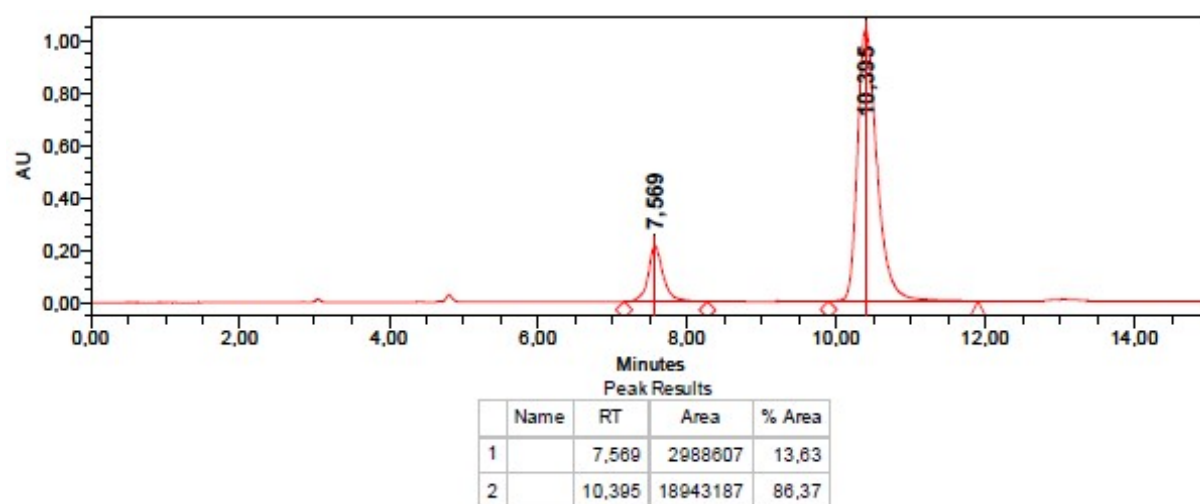

**Figure S46:** chPLC analysis of **1a** from one-pot synthesis after 24 h milling at 30 Hz (Table S2, Method A16-4). Left peak (n°1 in the table below the chromatogram) represents the (*S*)-enantiomer (RT: 7.60 min; 13.63%). Right peak (n°2 in the table below the chromatogram) represents the (*R*)-enantiomer (RT: 10.40 min; 86.37%). The stationary phase is the Chiralpak IA column and the mobile phase is composed of 90% of isohexane and 10% of ethanol.

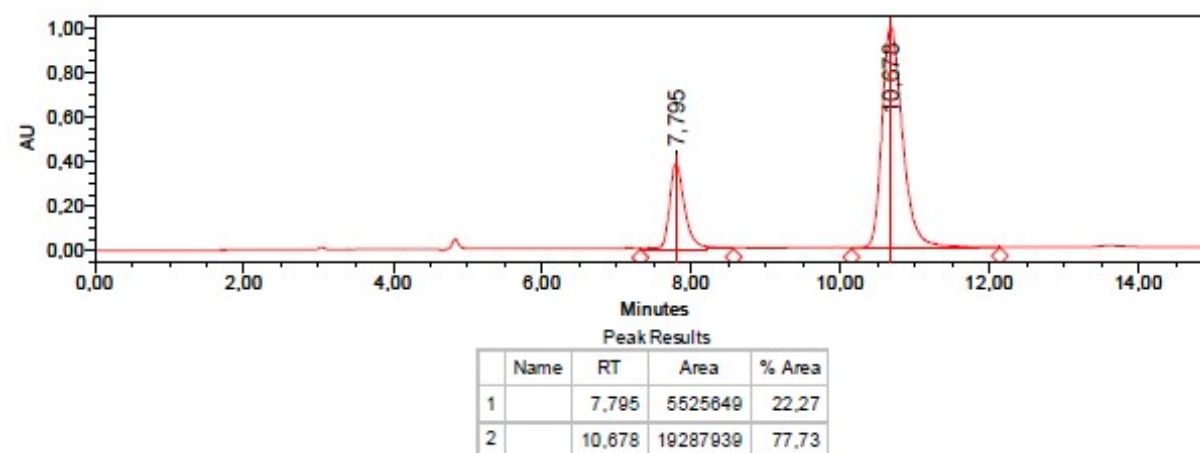

**Figure S47:** chPLC analysis of **1a** from one-pot synthesis after 24 h milling at 30 Hz (Table S2, Method A17). Left peak (n°1 in the table below the chromatogram) represents the (*S*)-enantiomer (RT: 7.80 min; 22.27%). Right peak (n°2 in the table below the chromatogram) represents the (*R*)-enantiomer (RT: 10.68 min; 77.73%). The stationary phase is the Chiralpak IA column and the mobile phase is composed of 90% of isohexane and 10% of ethanol.

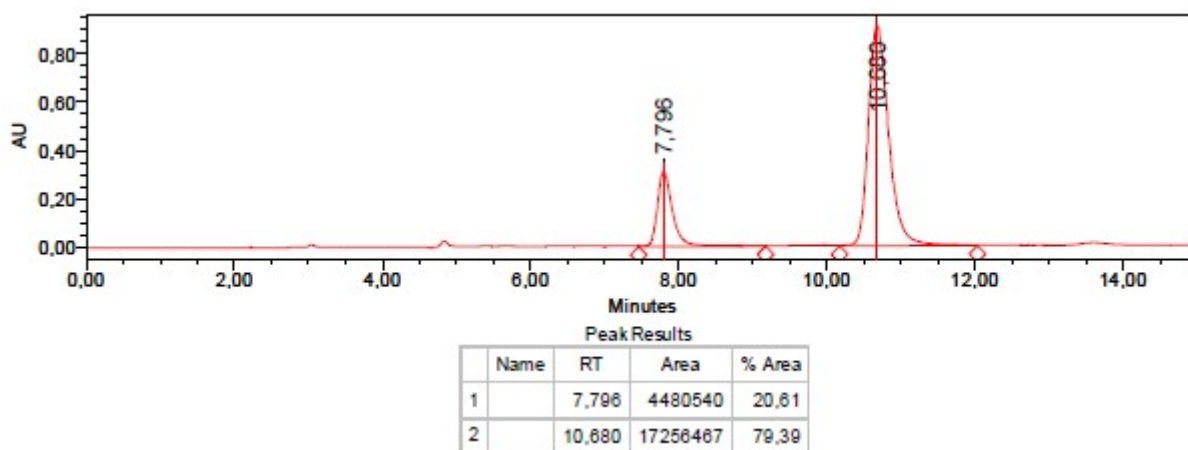

**Figure S48:** chPLC analysis of **1a** from one-pot synthesis after 24 h milling at 30 Hz (Table S2, Method A18). Left peak (n°1 in the table below the chromatogram) represents the (*S*)-enantiomer (RT: 7.80 min; 20.61%). Right peak (n°2 in the table below the chromatogram) represents the (*R*)-enantiomer (RT: 10.68 min; 79.39%). The stationary phase is the Chiralpak IA column and the mobile phase is composed of 90% of isohexane and 10% of ethanol.

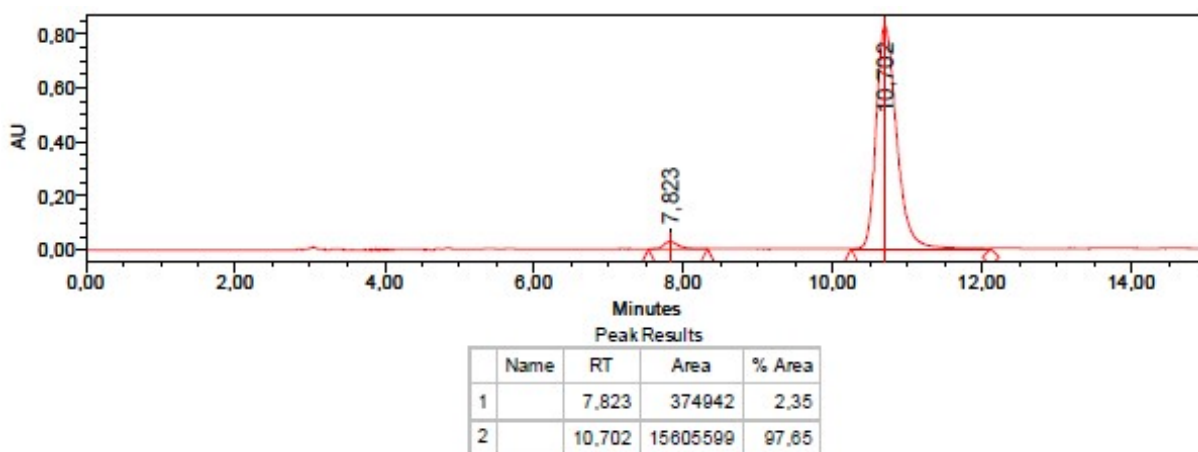

**Figure S49:** chPLC analysis of **1a** from one-pot synthesis after 24 h milling at 30 Hz (Table S2, Method A19-1). Left peak (n°1 in the table below the chromatogram) represents the (*S*)-enantiomer (RT: 7.82 min; 2.35%). Right peak (n°2 in the table below the chromatogram) represents the (*R*)-enantiomer (RT: 10.70 min; 97.65%). The stationary phase is the Chiralpak IA column and the mobile phase is composed of 90% of isohexane and 10% of ethanol.

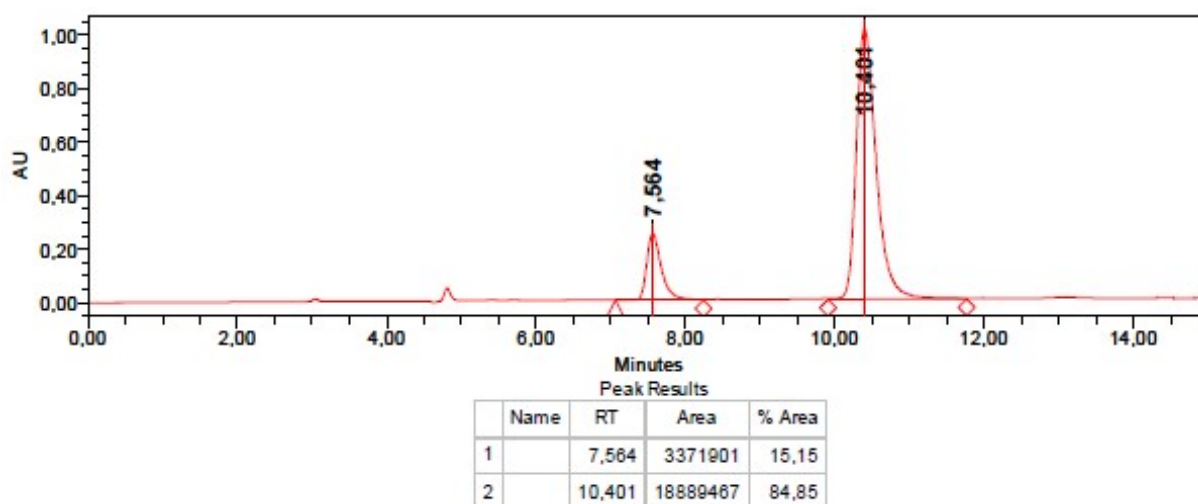

**Figure S50:** chPLC analysis of **1a** from one-pot synthesis after 24 h milling at 30 Hz (Table S2, Method A19-2). Left peak (n°1 in the table below the chromatogram) represents the (*S*)-enantiomer (RT: 7.56 min; 15.15%). Right peak (n°2 in the table below the chromatogram) represents the (*R*)-enantiomer (RT: 10.40 min; 84.85%). The stationary phase is the Chiralpak IA column and the mobile phase is composed of 90% of isohexane and 10% of ethanol.

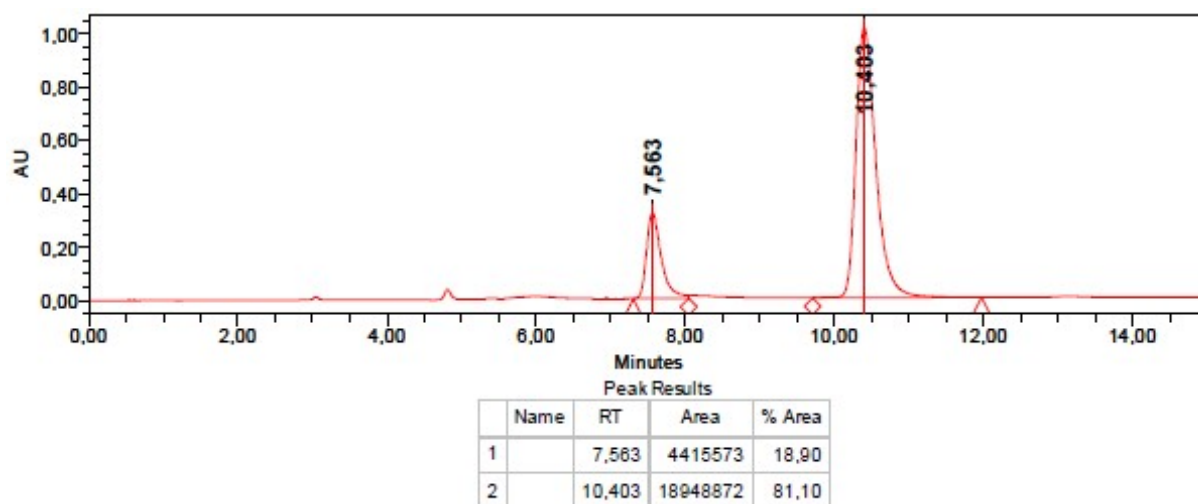

**Figure S51:** chPLC analysis of **1a** from one-pot synthesis after 24 h milling at 30 Hz (Table S2, Method A19-3). Left peak (n°1 in the table below the chromatogram) represents the (*S*)-enantiomer (RT: 7.56 min; 18.90%). Right peak (n°2 in the table below the chromatogram) represents the (*R*)-enantiomer (RT: 10.40 min; 81.10%). The stationary phase is the Chiralpak IA column and the mobile phase is composed of 90% of isohexane and 10% of ethanol.

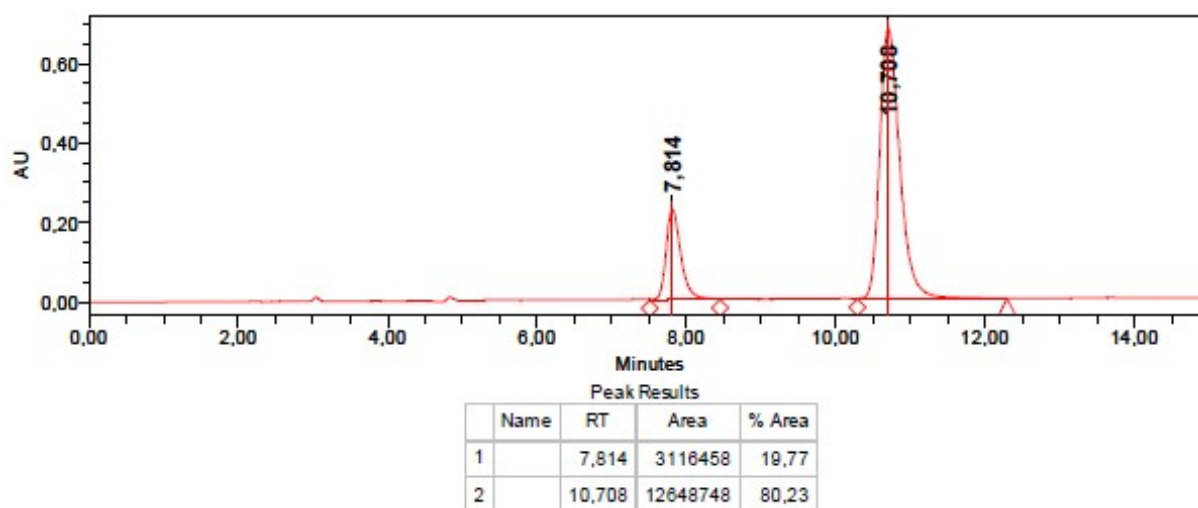

**Figure S52:** chPLC analysis of **1a** from one-pot synthesis after 24 h milling at 30 Hz (Table S2, Method A20). Left peak (n°1 in the table below the chromatogram) represents the (*S*)-enantiomer (RT: 7.81 min; 19.77%). Right peak (n°2 in the table below the chromatogram) represents the (*R*)-enantiomer (RT: 10.71 min; 80.23%). The stationary phase is the Chiralpak IA column and the mobile phase is composed of 90% of isohexane and 10% of ethanol.

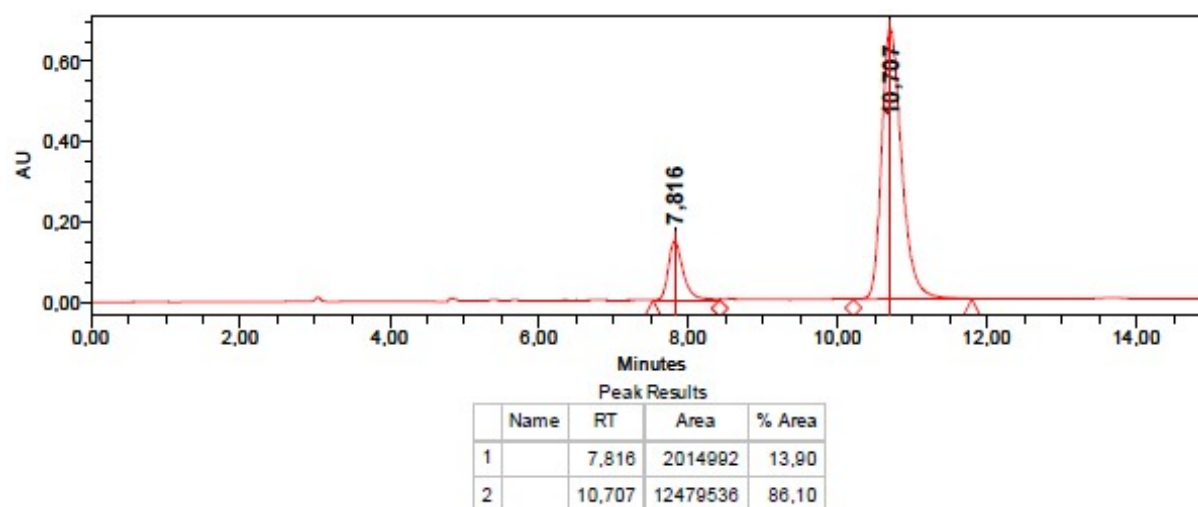

**Figure S53:** chPLC analysis of **1a** from one-pot synthesis after 24 h milling at 30 Hz (Table S2, Method A21). Left peak (n°1 in the table below the chromatogram) represents the (*S*)-enantiomer (RT: 7.82 min; 13.90%). Right peak (n°2 in the table below the chromatogram) represents the (*R*)-enantiomer (RT: 10.71 min; 86.10%). The stationary phase is the Chiralpak IA column and the mobile phase is composed of 90% of isohexane and 10% of ethanol.

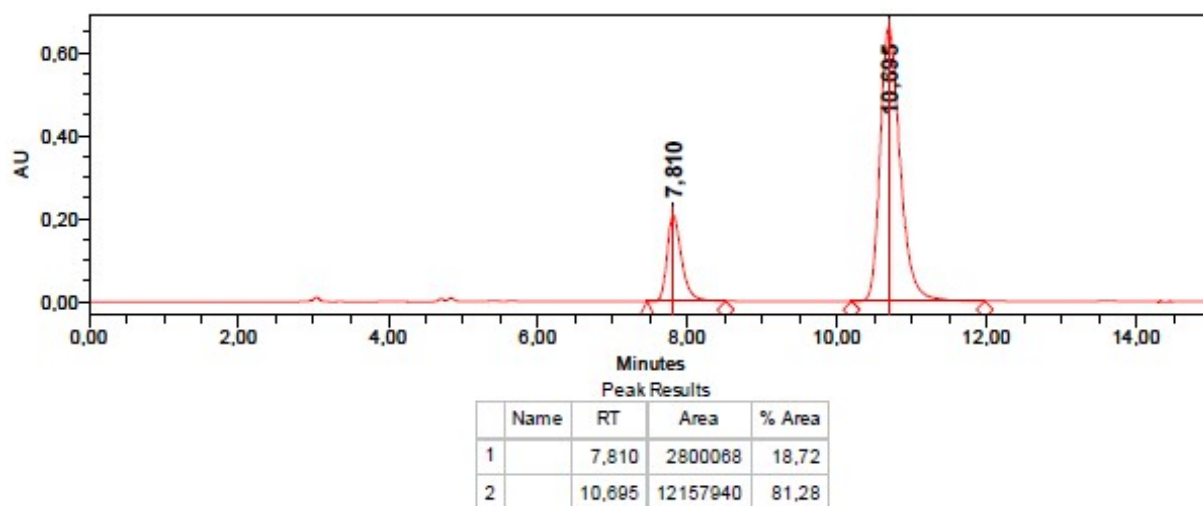

**Figure S54:** chPLC analysis of **1a** from one-pot synthesis after 24 h milling at 30 Hz (Table S2, Method A22). Left peak (n°1 in the table below the chromatogram) represents the (*S*)-enantiomer (RT: 7.81 min; 18.72%). Right peak (n°2 in the table below the chromatogram) represents the (*R*)-enantiomer (RT: 10.70 min; 81.28%). The stationary phase is the Chiralpak IA column and the mobile phase is composed of 90% of isohexane and 10% of ethanol.

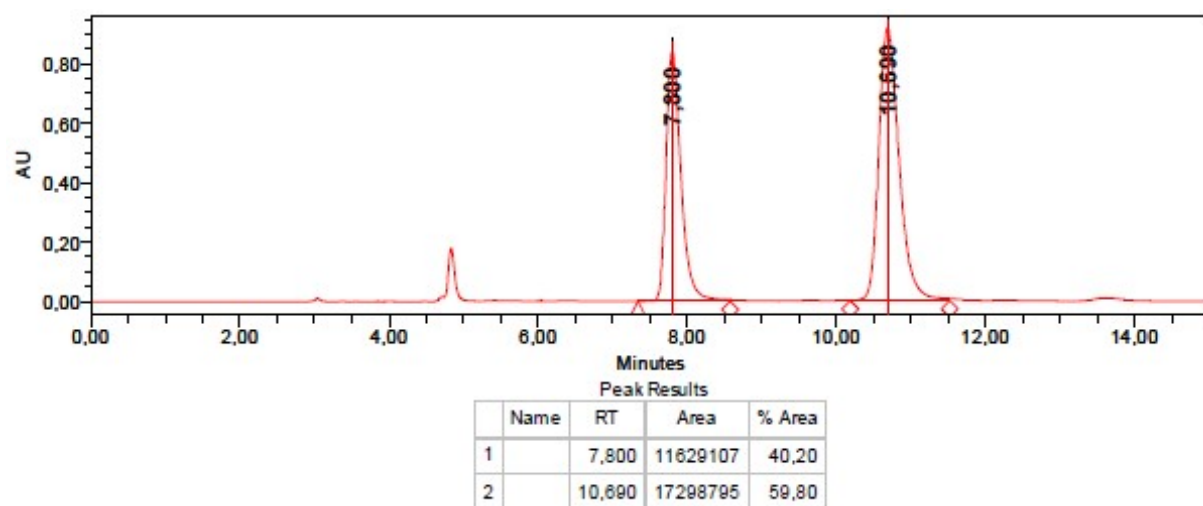

**Figure S55:** chPLC analysis of **1a** from one-pot synthesis after 24 h milling at 30 Hz (Table S2, Method A23). Left peak (n°1 in the table below the chromatogram) represents the (*S*)-enantiomer (RT: 7.80 min; 40.20%). Right peak (n°2 in the table below the chromatogram) represents the (*R*)-enantiomer (RT: 10.69 min; 59.80%). The stationary phase is the Chiralpak IA column and the mobile phase is composed of 90% of isohexane and 10% of ethanol.

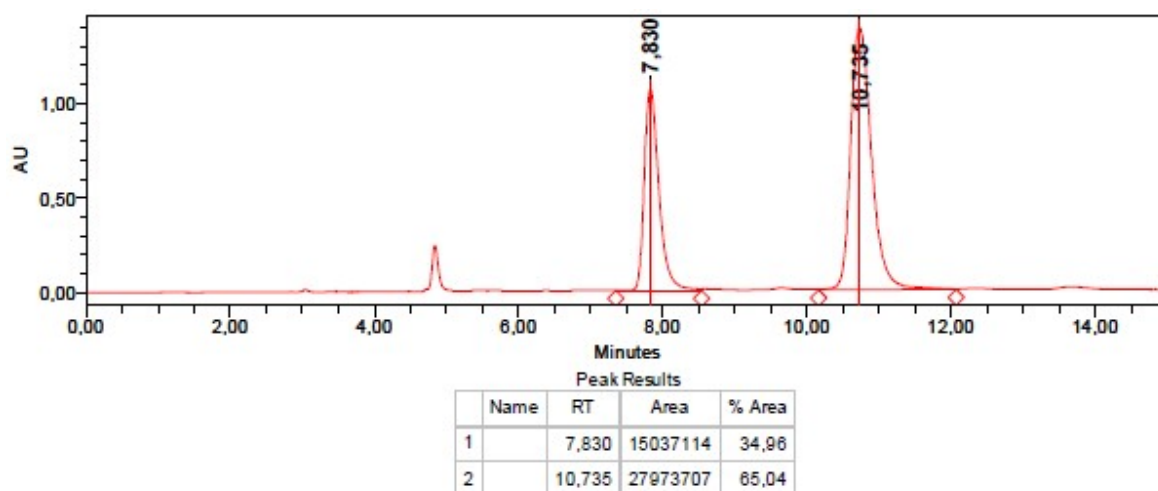

**Figure S56:** chPLC analysis of **1a** from one-pot synthesis after 24 h milling at 30 Hz (Table S2, Method A24). Left peak (n°1 in the table below the chromatogram) represents the (*S*)-enantiomer (RT: 7.83 min; 34.96%). Right peak (n°2 in the table below the chromatogram) represents the (*R*)-enantiomer (RT: 10.73 min; 65.04%). The stationary phase is the Chiralpak IA column and the mobile phase is composed of 90% of isohexane and 10% of ethanol.

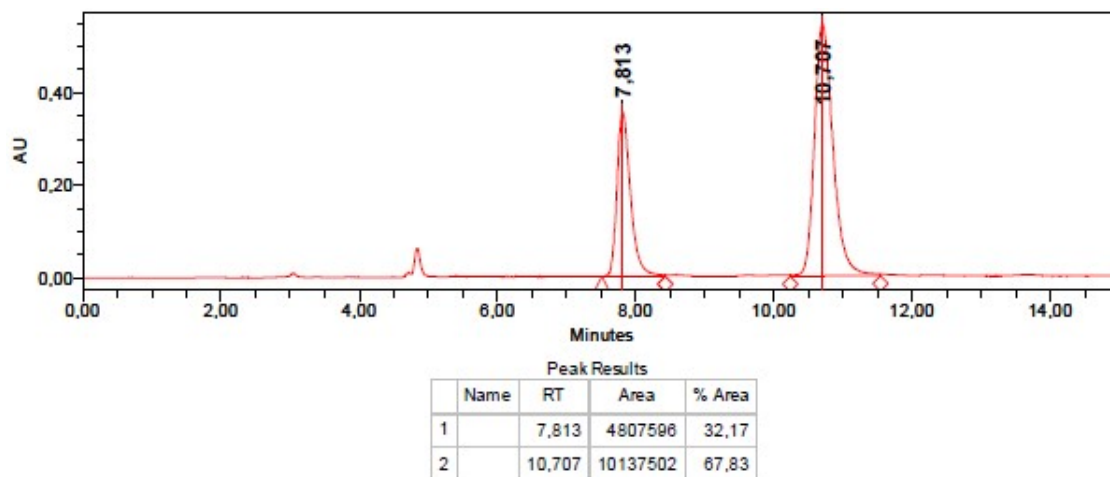

**Figure S57:** chPLC analysis of **1a** from one-pot synthesis after 24 h milling at 30 Hz (Table S2, Method A25). Left peak (n°1 in the table below the chromatogram) represents the (*S*)-enantiomer (RT: 7.81 min; 32.17%). Right peak (n°2 in the table below the chromatogram) represents the (*R*)-enantiomer (RT: 10.71 min; 67.83%). The stationary phase is the Chiralpak IA column and the mobile phase is composed of 90% of isohexane and 10% of ethanol.

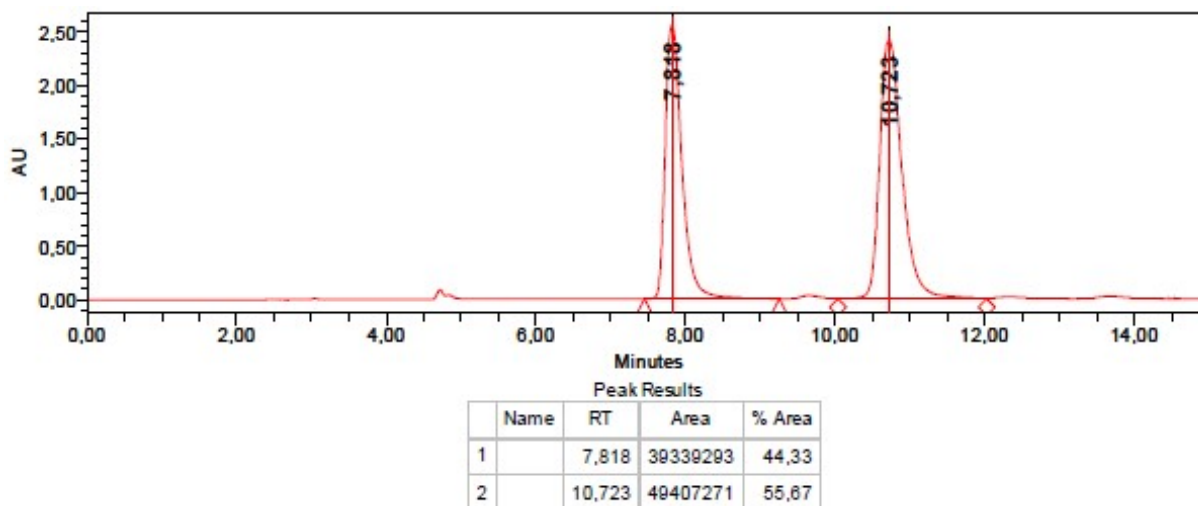

**Figure S58:** chPLC analysis of **1a** from one-pot synthesis after 24 h milling at 30 Hz (Table S2, Method A26). Left peak (n°1 in the table below the chromatogram) represents the (*S*)-enantiomer (RT: 7.82 min; 44.33%). Right peak (n°2 in the table below the chromatogram) represents the (*R*)-enantiomer (RT: 10.72 min; 55.67%). The stationary phase is the Chiralpak IA column and the mobile phase is composed of 90% of isohexane and 10% of ethanol.

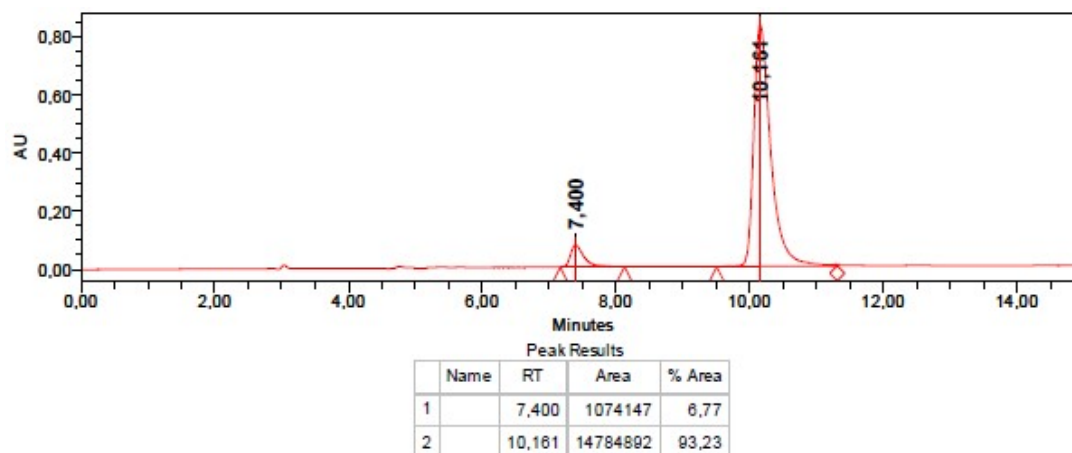

**Figure S59:** chPLC analysis of **1a** from one-pot synthesis after 24 h milling at 30 Hz (Table S2, Method A27-1). Left peak (n°1 in the table below the chromatogram) represents the (*S*)-enantiomer (RT: 7.40 min; 6.77%). Right peak (n°2 in the table below the chromatogram) represents the (*R*)-enantiomer (RT: 10.16 min; 93.23%). The stationary phase is the Chiralpak IA column and the mobile phase is composed of 90% of isohexane and 10% of ethanol.

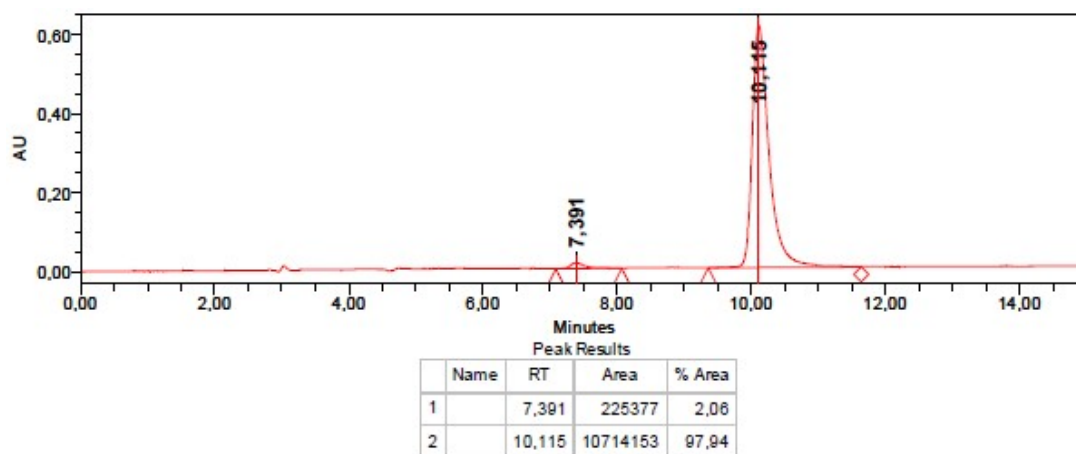

**Figure S60:** chPLC analysis of **1a** from one-pot synthesis after 24 h milling at 30 Hz (Table S2, Method A27-2). Left peak (n°1 in the table below the chromatogram) represents the (*S*)-enantiomer (RT: 7.39 min; 2.06%). Right peak (n°2 in the table below the chromatogram) represents the (*R*)-enantiomer (RT: 10.11 min; 97.94%). The stationary phase is the Chiralpak IA column and the mobile phase is composed of 90% of isohexane and 10% of ethanol.

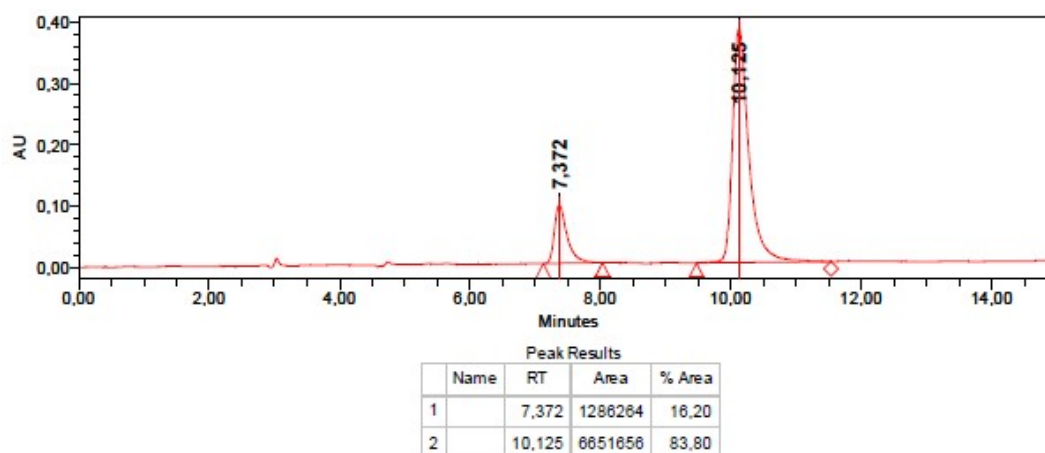

**Figure S61:** chPLC analysis of **1a** from one-pot synthesis after 24 h milling at 30 Hz (Table S2, Method A27-3). Left peak (n°1 in the table below the chromatogram) represents the (*S*)-enantiomer (RT: 7.37 min; 16.20%). Right peak (n°2 in the table below the chromatogram) represents the (*R*)-enantiomer (RT: 10.13 min; 83.80%). The stationary phase is the Chiralpak IA column and the mobile phase is composed of 90% of isohexane and 10% of ethanol.

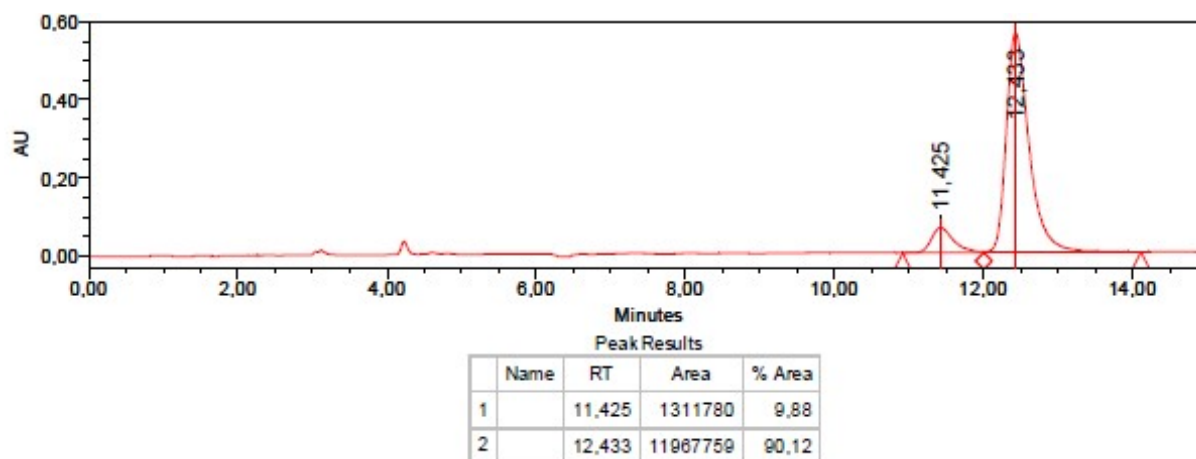

**Figure S62:** chPLC analysis of **1b** from one-pot synthesis after 24 h milling at 30 Hz (Table S3, Method B1). Left peak (n°1 in the table below the chromatogram) represents the (*S*)-enantiomer (RT: 11.43 min; 9.88%). Right peak (n°2 in the table below the chromatogram) represents the (*R*)-enantiomer (RT: 12.43 min; 90.12%). The stationary phase is the Chiralpak IA column and the mobile phase is composed of 95% of isohexane and 5% of ethanol.

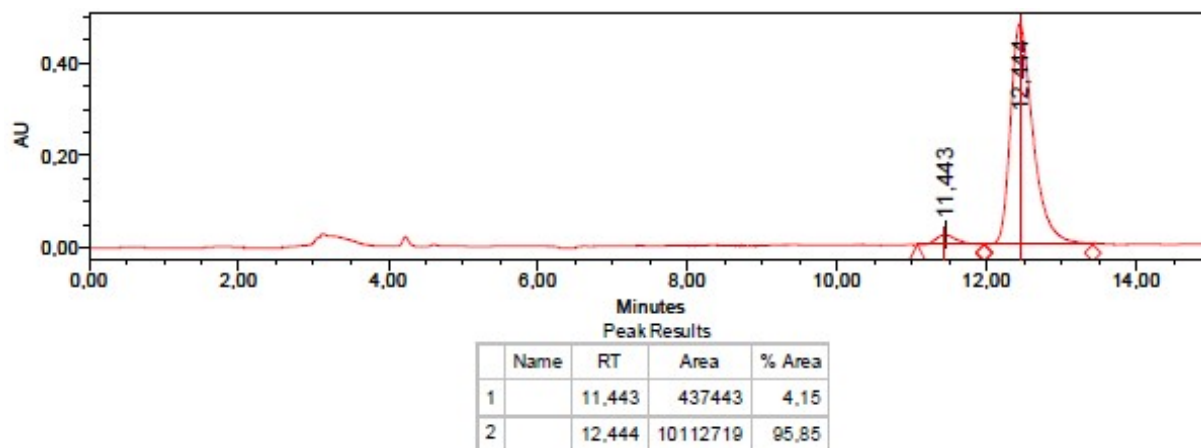

**Figure S63:** cHPLC analysis of **1b** from one-pot synthesis after 24 h milling at 30 Hz (Table S3, Method B2-1). Left peak (n°1 in the table below the chromatogram) represents the (*S*)-enantiomer (RT: 11.44 min; 4.15%). Right peak (n°2 in the table below the chromatogram) represents the (*R*)-enantiomer (RT: 12.44 min; 95.85%). The stationary phase is the Chiralpak IA column and the mobile phase is composed of 95% of isohexane and 5% of ethanol.

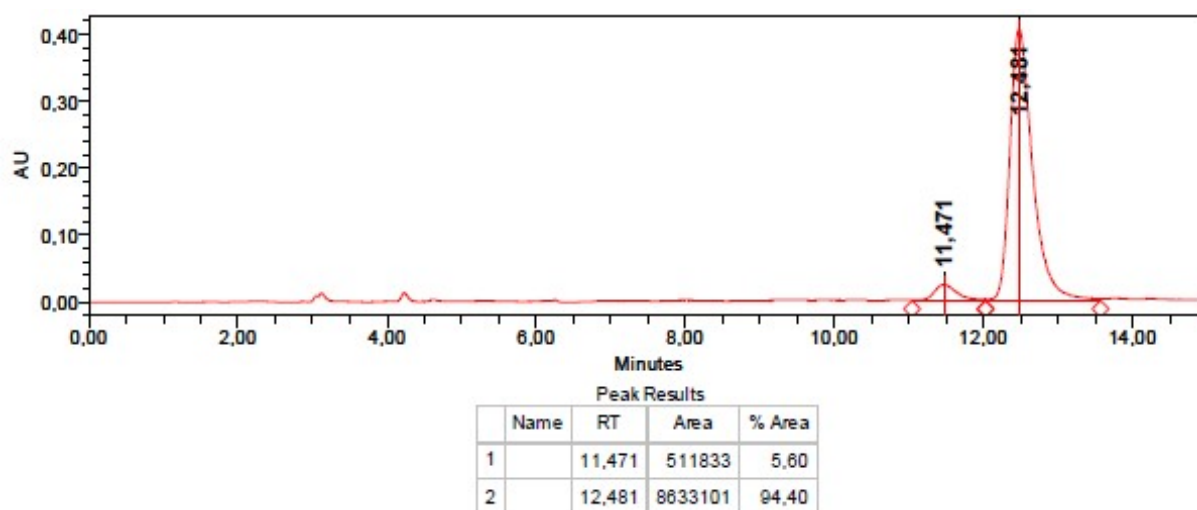

**Figure S64:** cHPLC analysis of **1b** from one-pot synthesis after 24 h milling at 30 Hz (Table S3, Method B2-2). Left peak (n°1 in the table below the chromatogram) represents the (*S*)-enantiomer (RT: 11.47 min; 5.60%). Right peak (n°2 in the table below the chromatogram) represents the (*R*)-enantiomer (RT: 12.48 min; 94.40%). The stationary phase is the Chiralpak IA column and the mobile phase is composed of 95% of isohexane and 5% of ethanol.

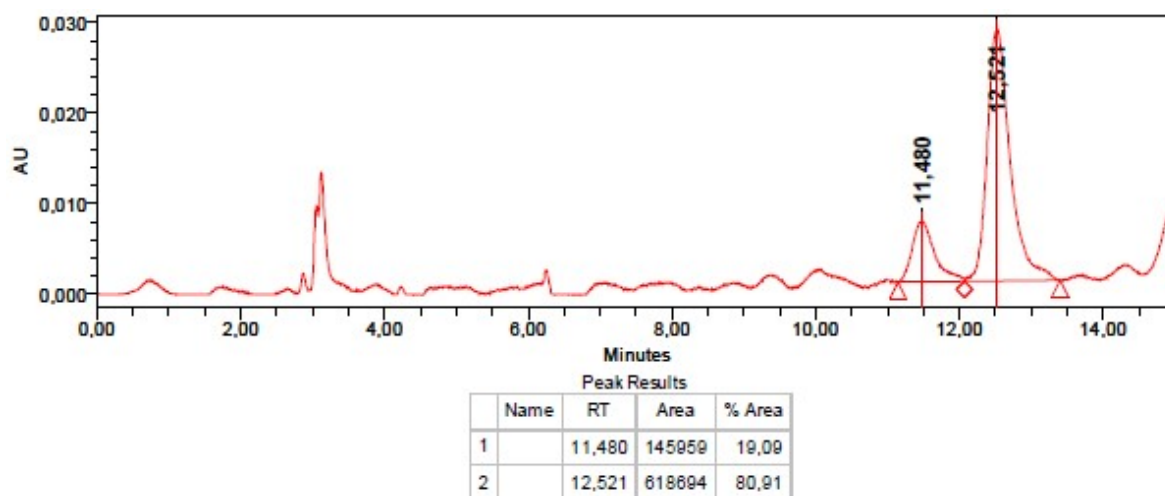

**Figure S65:** cHPLC analysis of **1b** from one-pot synthesis after 24 h milling at 30 Hz (Table S3, Method B2-3). Left peak (n°1 in the table below the chromatogram) represents the (*S*)-enantiomer (RT: 11.48 min; 19.09%). Right peak (n°2 in the table below the chromatogram) represents the (*R*)-enantiomer (RT: 12.52 min; 80.91%). The stationary phase is the Chiralpak IA column and the mobile phase is composed of 95% of isohexane and 5% of ethanol.

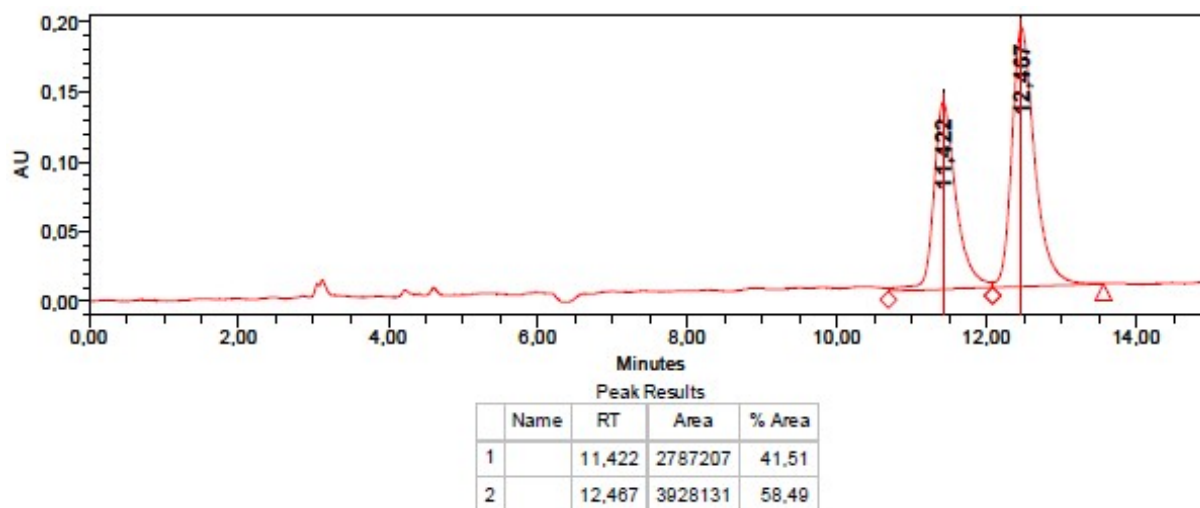

**Figure S66:** cHPLC analysis of **1b** from one-pot synthesis after 24 h milling at 30 Hz (Table S3, Method B2-4). Left peak (n°1 in the table below the chromatogram) represents the (*S*)-enantiomer (RT: 11.42 min; 41.51%). Right peak (n°2 in the table below the chromatogram) represents the (*R*)-enantiomer (RT: 12.47 min; 58.49%). The stationary phase is the Chiralpak IA column and the mobile phase is composed of 95% of isohexane and 5% of ethanol.

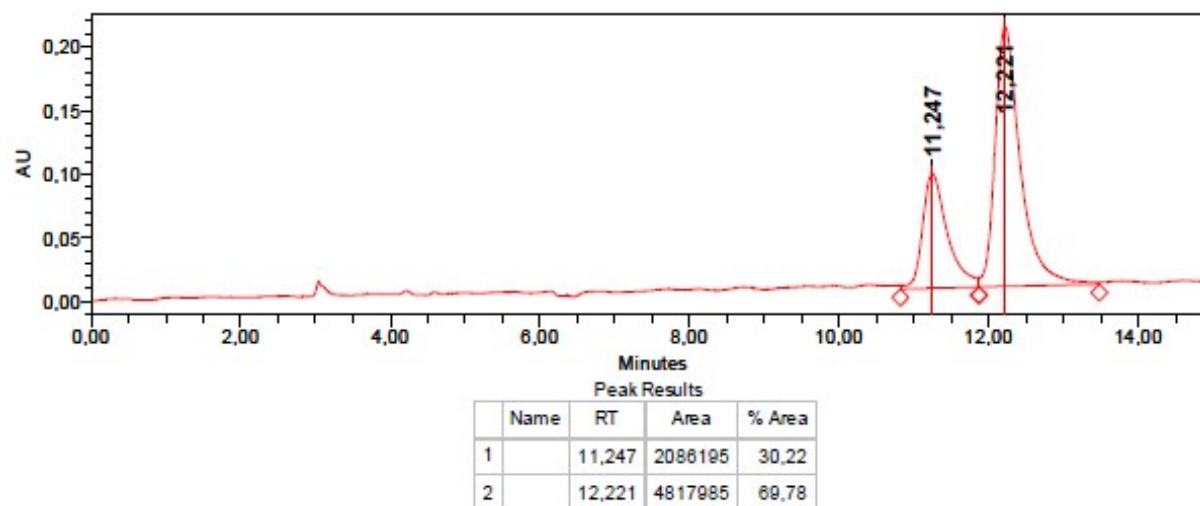

**Figure S67:** cHPLC analysis of **1b** from one-pot synthesis after 24 h milling at 30 Hz (Table S3, Method B3-1). Left peak (n°1 in the table below the chromatogram) represents the (*S*)-enantiomer (RT: 11.24 min; 30.22%). Right peak (n°2 in the table below the chromatogram) represents the (*R*)-enantiomer (RT: 12.22 min; 69.78%). The stationary phase is the Chiralpak IA column and the mobile phase is composed of 95% of isohexane and 5% of ethanol.

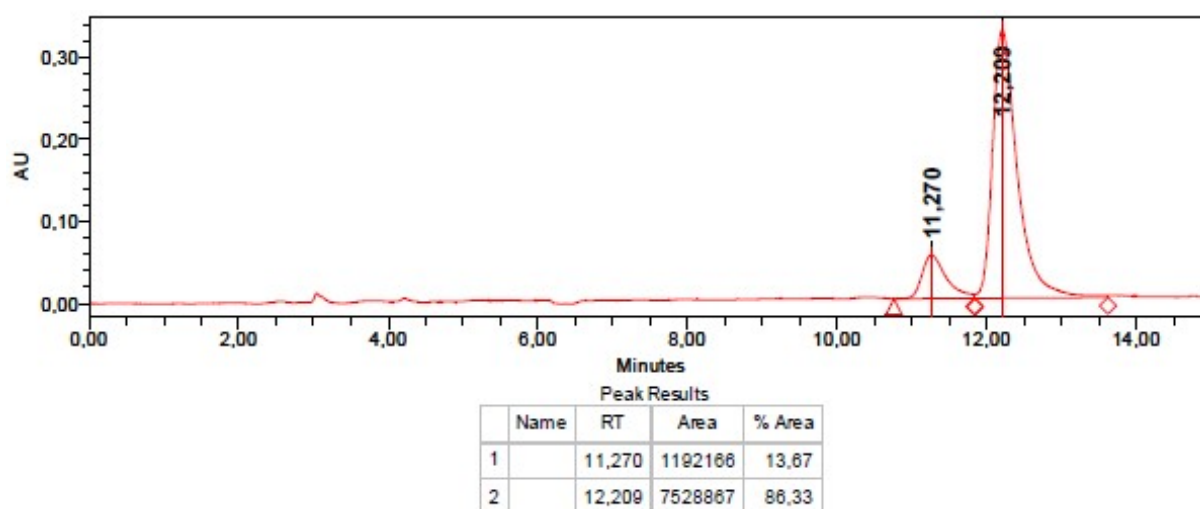

**Figure S68:** cHPLC analysis of **1b** from one-pot synthesis after 24 h milling at 30 Hz (Table S3, Method B3-2). Left peak (n°1 in the table below the chromatogram) represents the (*S*)-enantiomer (RT: 11.27 min; 13.67%). Right peak (n°2 in the table below the chromatogram) represents the (*R*)-enantiomer (RT: 12.21 min; 86.33%). The stationary phase is the Chiralpak IA column and the mobile phase is composed of 95% of isohexane and 5% of ethanol.

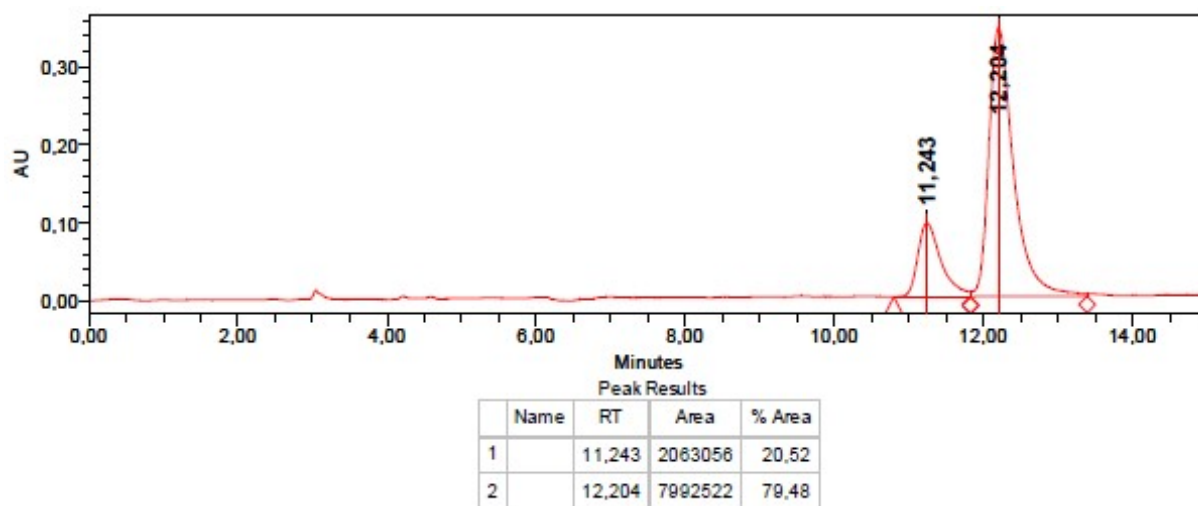

**Figure S69:** chPLC analysis of **1b** from one-pot synthesis after 24 h milling at 30 Hz (Table S3, Method B3-3). Left peak (n°1 in the table below the chromatogram) represents the (*S*)-enantiomer (RT: 11.24 min; 20.52%). Right peak (n°2 in the table below the chromatogram) represents the (*R*)-enantiomer (RT: 12.20 min; 79.48%). The stationary phase is the Chiralpak IA column and the mobile phase is composed of 95% of isohexane and 5% of ethanol.
